# Supplementary material for: Design, characterization, and first field deployment of a novel aircraft-based aerosol mass spectrometer combining the laser ablation and flash vaporization techniques
Source: Copernicus journal article supplement (doi:10.5194/amt-2021-271), 2021-09-17
Supplement: Supplementary file 1 [file amt-2021-271-supplement.pdf]

## Supplementary information for:

# Design, characterization, and first field deployment of a novel aircraft-based aerosol mass spectrometer combining the laser ablation and flash vaporization techniques

Andreas Hünig<sup>1,2</sup>, Oliver Appel<sup>1,2</sup>, Antonis Dragoneas<sup>1,2</sup>, Sergej Molleker<sup>1,2</sup>, Hans-Christian Clemen<sup>2</sup>, Frank Helleis<sup>2</sup>, Thomas Klimach<sup>2</sup>, Franziska Köllner<sup>1</sup>, Thomas Böttger<sup>2</sup>, Frank Drewnick<sup>2</sup>, Johannes Schneider<sup>2</sup>, and Stephan Borrmann<sup>1,2</sup>

<sup>1</sup>Institute for Atmospheric Physics, Johannes Gutenberg University, Mainz, Germany

10 <sup>2</sup>Max Planck Institute for Chemistry, Mainz, Germany

## S1 Instrument design

### S1.1 Three-dimensional drawing and photographs of the ERICA

To visualize the orientation of the major components, Fig. S1 shows a three-dimensional drawing of the instrument body including the TMPs in dark red. The particle entry includes the CPI (dark green) which is mounted to the aerodynamic lens (ADL; bright red) that intrudes into the detection unit recipient (light gray). The detection laser units (orange) are oriented perpendicular (y-direction) to the particle beam (z-direction) and to the PMTs (dark blue, x-direction). The ablation laser head (black) is mounted on top of the B-ToF-MS (light blue) and emits the laser beam towards a dichroitic mirror that reflects the laser beam in the same direction as the detection lasers (-y-direction). A plano-convex lens focuses the laser beam on the particle beam. Hence, all lasers are oriented parallel onto the particle beam. The shutter unit (SU; purple) of the ERICA-AMS is located between the B-ToF-MS and the ionizer chamber of the ERICA-AMS (yellow). The C-ToF-MS (light green) protrudes over the B-ToF-MS (light blue). Fig. S2 shows photographs of the ERICA.

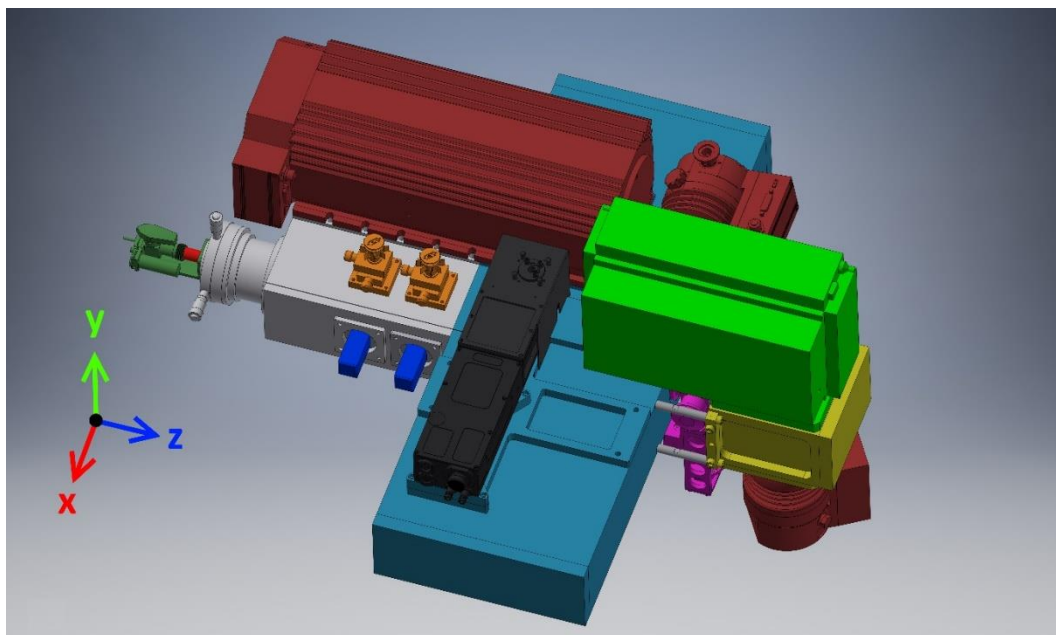

25 **Fig. S1: Three-dimensional drawing of the instruments body showing the major components of the ERICA-LAMS and the ERICA-AMS color coded (see text). The three-dimensional drawings of the turbo molecular pumps (dark red; Pfeiffer Vacuum GmbH, Germany) and the ablation laser head (black; Quantel, France) were provided by the manufacturers.**

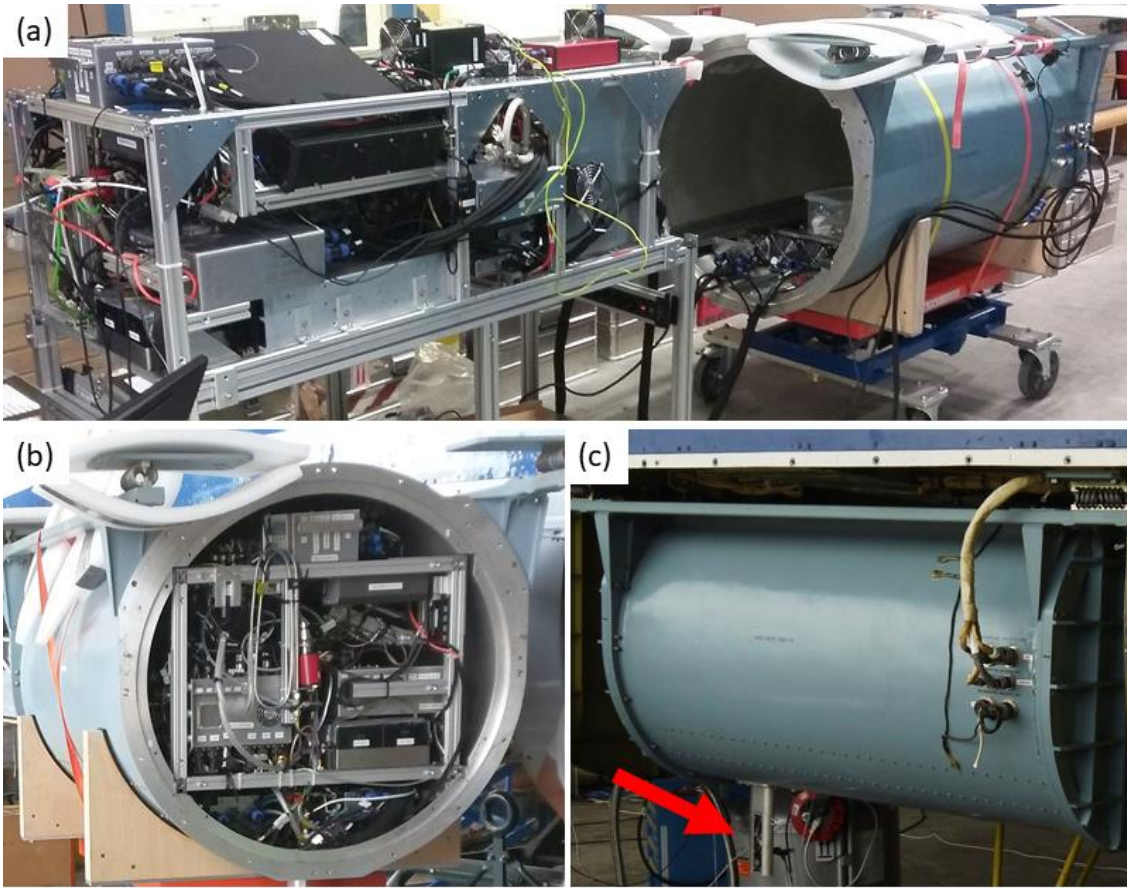

Fig. S2: (a) ERICA mounted in the rack for the StratoClim campaign outside of the container for deployment aboard the M-55 Geophysica (Dragoneas et al., 2021). (b) ERICA inside the container with opened front lid. (c) ERICA inside the container with closed lids and mounted on the aircraft. The shaft of the inlet for sampling the ambient air can be seen protruding at the bottom left of the container (red arrow).

### S1.2 Geometry and distance ratios in the ERICA

The parameters  $r_{eff}$ ,  $\sigma$ , and  $x_0$  were determined by Eqs. (5), (S14), and (S16) and are thus in the dimension relative to the ADL position  $x_{pos}$ . For the graphics and the calculations in Sect. 3.3.2 and 3.3.3, the parameters were rescaled to the dimension of the particle beam at the specific location (PDU1, PDU2, ablation point, and ERICA-AMS vaporizer) by the intercept theorem. Table S1 shows these factors according to the distances in the ERICA (see Fig. S3). The pulse generator multiplier (see Sect. 2.4) value of the TC is based on the ratio of the PDU2-ablation spot distance to the PDU1-PDU2 distance and can be calculated to  $\frac{120,7 \text{ mm}}{66,5 \text{ mm}} = 1.815$ .

In Fig. S3, the red arrows indicate the directions of the movement of the lens and the particle beam during an ADL position scan in x-direction (using the ball joint as pivot).

Table S1: Factors to rescale the parameters  $r_{eff,L}$ ,  $r_{eff,V}$ ,  $\sigma$ , and  $x_0$  to the dimension of the particle beam at the specific location: PDU1, PDU2, ablation point, and ERICA-AMS vaporizer.

| Location       | Factor                                                               |
|----------------|----------------------------------------------------------------------|
| PDU1           | $\frac{58.8 \text{ mm}}{133.7 \text{ mm}} = 0.44$                    |
| PDU2           | $\frac{58.8 \text{ mm} + 66.5 \text{ mm}}{133.7 \text{ mm}} = 0.937$ |
| ablation point | $\frac{246 \text{ mm}}{133.7 \text{ mm}} = 1.840$                    |
| vaporizer      | $\frac{547.3 \text{ mm}}{133.7 \text{ mm}} = 4.093$                  |

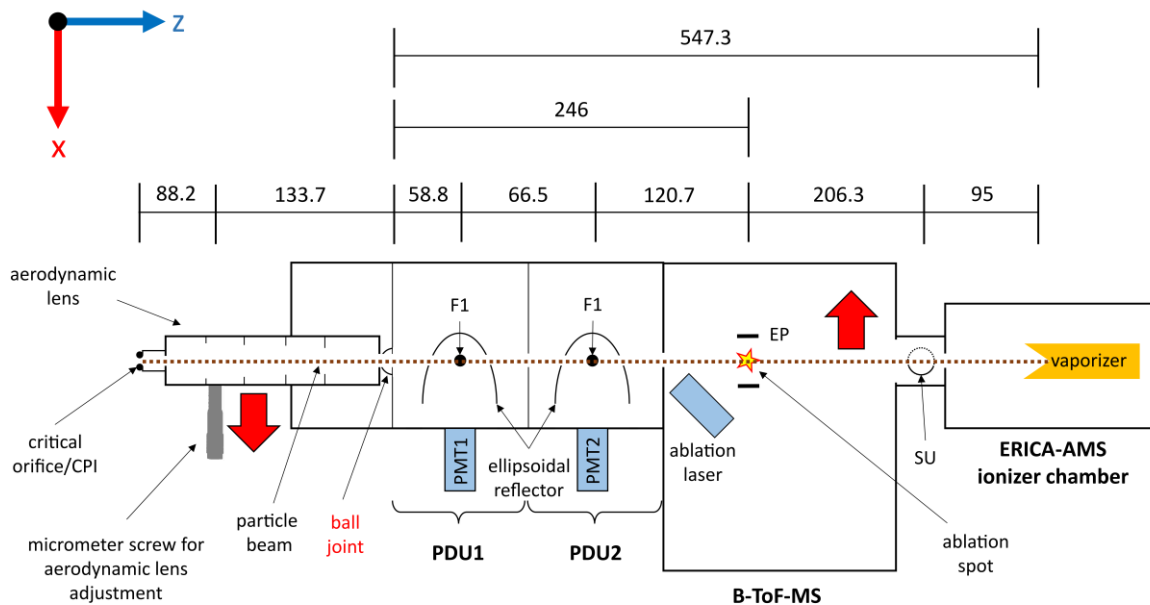

**Fig. S3: Scheme of the geometry and relevant distances (in mm) along the particle beam axis in the ERICA (not to scale; see also Fig. 1). The red arrows indicate the directions of the movement of the lens and the particle beam during a scan with the ADL in x-direction. F1 is the focal point of the ellipsoidal reflector (compare Fig. S4).**

### 5 S1.3 Design of the ellipsoidal reflectors

The first elliptical focal point F1 of the reflector is adjusted to coincide with the axis of the particle beam as well as with the focal point of the laser unit. At its open end, the reflector has an inner diameter of 50.8 mm and the distance between the ellipsoid's two foci is 49.78 mm. Four openings allow the laser beam and the perpendicularly incoming particle beam to pass through the reflectors. Fig. S4a shows the ellipsoidal reflector including the taper angles (blue, green, and red taper) not contributing to the scattered light signal recorded by the PMT, i.e., only light that is reflected on the reflector surface (yellow) is collected in F2. Thus, light that is scattered into a taper angle of  $180^\circ$  to  $164.8^\circ$  and  $14.0^\circ$  to  $0^\circ$  with respect to the laser beam axis (y-axis, green taper) and into a taper angle of  $180^\circ$  to  $175^\circ$  and  $5.0^\circ$  to  $0^\circ$  with respect to the particle beam axis (z-axis, blue taper) is not detected. In addition, scattered light that is emitted in a taper angle of  $44.4^\circ$  with respect to the F1-F2 axis (x-axis, red taper) is not reflected by the ellipsoidal reflector and thus not detected (see example Beam B3 in Fig. S4b). At F2, a spatial filter with an aperture of 0.2 mm diameter is positioned such that the light scattered from the particles is separated from the background light.

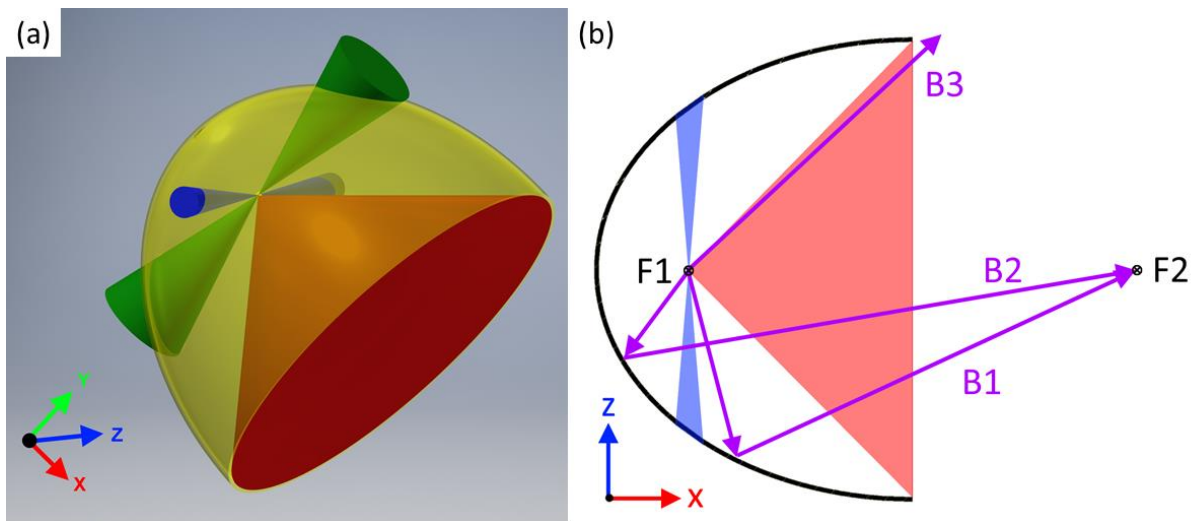

Fig. S4: Left: Three-dimensional drawing of the ellipsoidal reflector (semi-transparent yellow) including the taper angle ranges (blue, green, and red; see text) not contributing to the scattered light signal recorded by the PMT. Right: Scheme of the ellipsoidal reflector in the  $xz$ -plane with various beam paths of light scattered by a particle. The beams B1 and B2 are reflected to F2 and thus detected by the PMT, beam B3 is not detected.

5

## S2 Laser characterization

The detection and ablation laser beam waists were determined by a knife edge experiment. For this, a razor blade was moved stepwise perpendicularly into the respective laser beam and the remaining energy was measured (see Sect. 3.1).

### S2.1 Characterization of the detection lasers

- 5 Fig. S5 shows the plots of the measurements of the knife edge experiment at the detection laser beam (see Sect. 3.1 and caption for further details).

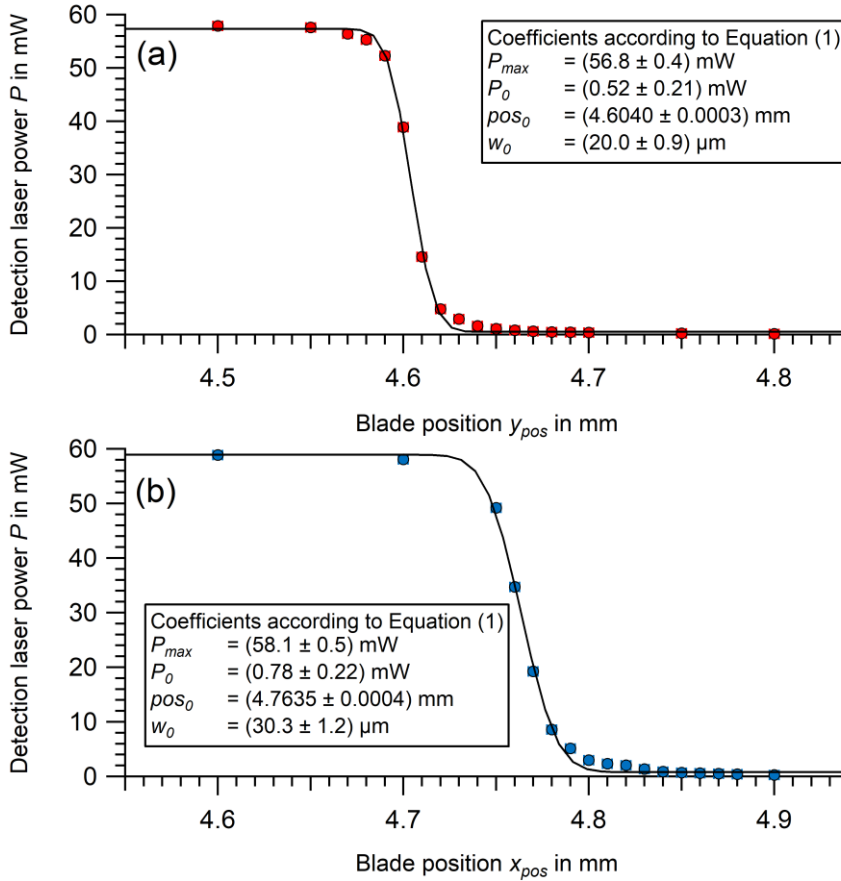

Fig. S5: Detection laser beam characterization measurement in the focal point of the optical setup (x-direction: panel a, y-direction: panel b) curve fitted with Eq. (1), where  $P$  is the measured power,  $P_0$  is the offset of the power for the fitting routine baseline subtraction,  $P_{max}$  the Gaussian area of the intensity profile,  $pos_0$  the central point,  $pos$  the horizontal position of the blade, and  $w_{0,rad}$  the beam waist radius ( $1/e^2$ -radius) of the Gaussian profile in focal point. The uncertainties of the detection laser power  $P$  reflect the fluctuation of the value at the bolometer display and the uncertainty of the blade position ( $x_{pos}$  and  $y_{pos}$ ) is based on the reading error of the micrometer positioning system. The uncertainty bars are smaller than the symbols. The text boxes display the values and uncertainties of the parameters from the curve fitting.

## S2.2 Characterization of the ablation laser focus

In order to determine the characteristic parameters of the ablation laser focus, the knife edge experiment is conducted at eight different positions along the laser beam's optical axis. Fig. S6 shows the plot of the measurements for the ablation laser beam (see Sect. 3.1 and caption for further details).

5

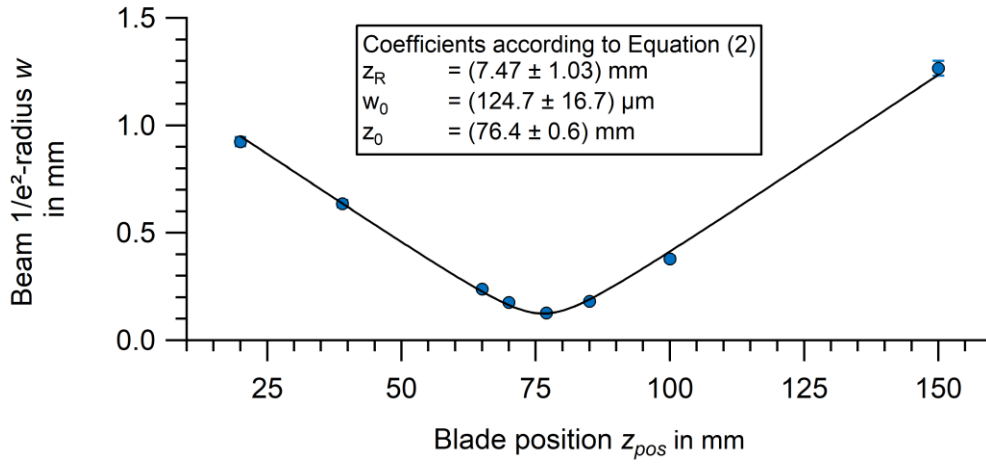

Fig. S6: Ablation laser beam characterization along the laser beam axis by curve fitting with Eq. (2), where  $z_R$  is the Rayleigh range,  $z_0$  the focal length, and  $w_{0,rad}$  is the beam waist radius ( $\frac{1}{e^2}$ -radius). The uncertainties of the ablation laser energy  $E$  reflect the fluctuation of the value at the energy meter display and the uncertainty of the blade position  $z_{pos}$  is based on the reading error of the used caliper. The uncertainty bars are smaller than the symbols. The text box displays the values and uncertainties of the parameters from the curve fitting.

10

### S3 Experimental setup for laboratory experiments and deployed particle sizes

For clarity of the description in the paper, the three straightforward particle generation setups are depicted in Fig. S7. Out of a salt solution or polystyrene latex NIST particle size standard (PSL; Polysciences Europe GmbH, Germany) suspension the particles were created in a nebulizer (TSI 3076, TSI Inc., St. Paul, Minnesota, USA). For the PSL size calibration the aerosol was directed through two silica gel (orange gel, Carl Roth GmbH & Co. KG, Germany) diffusion dryers into ERICA (Setup A in Fig. S7). The particle sizes used are listed in Table S2. All the ammonium nitrate (AN; Merck KGaA, Germany) particles (Table S3) and the PSL particles for the particle beam characterization by the ADL position scan (see Sect. 3.3; Table S4) were additionally charge neutralized by a X-ray bipolar charger (TSI 3012, TSI Inc., St. Paul, Minnesota, USA) and size selected by a differential mobility analyzer (DMA, Minnesota Type 5.5-900, GRIMM Aerosol Technik Ainring GmbH & Co. KG, Germany). After passing the DMA, the aerosol output is split into two lines. One line to ERICA and the other to a condensation particle counter (CPC, Series 5.400 CPC, GRIMM Aerosol Technik Ainring GmbH & Co. KG, Germany) for number concentration measurements (Setup B in Fig. S7). Setup C (Fig. S7) refers to the case, where an OPC was used as a reference device (see Table S2).

The measurements with the OPC were conducted only with PDU1 to reduce measurement time and were adopted from Molleker et al. (2020). During these measurements, the thresholds at PMT1 were adjusted (increasing with particle size) to filter the particle signal from signals caused by residual particle fragments in the PSL suspension. Thus, the parameter  $r_{eff,L}$  (see Sect. 3.3.2) is somewhat underestimated for these measurements. Also, the measurements with the OPC were conducted after the particle time-of-flight calibration and particle beam characterization measurements with the CPC as a reference device. Before the measurements with the OPC could be performed, the ADL was accidentally re-installed rotated by about 90°. Since the overall particle beam cross-sectional area does not describe a circle but an oval shape (Hünig, 2021), the rotation of the ADL might partially influence the results. However, we assume that the parameters  $r_{eff,L}$ ,  $r_{eff,V}$ ,  $\sigma$ , and  $A_{scan}$  are only slightly dependent on the rotation angle of the lens. Thus, they are included in the graphics (see Sect. 3.3) to extend the measurement range, despite being not fully comparable. The parameter  $x_0$  seems to be more dependent on the rotation angle (see Sect. S4.6.2). Thus,  $x_0$  for the OPC measurements is not presented in Fig. 10 and Fig. S13. However, the ADL was rotated after the field deployment in Kathmandu, Nepal (see Sect. 4). Thus, the characterization measurements with the CPC in Sect. 3.3 reflect the conditions during the field deployment.

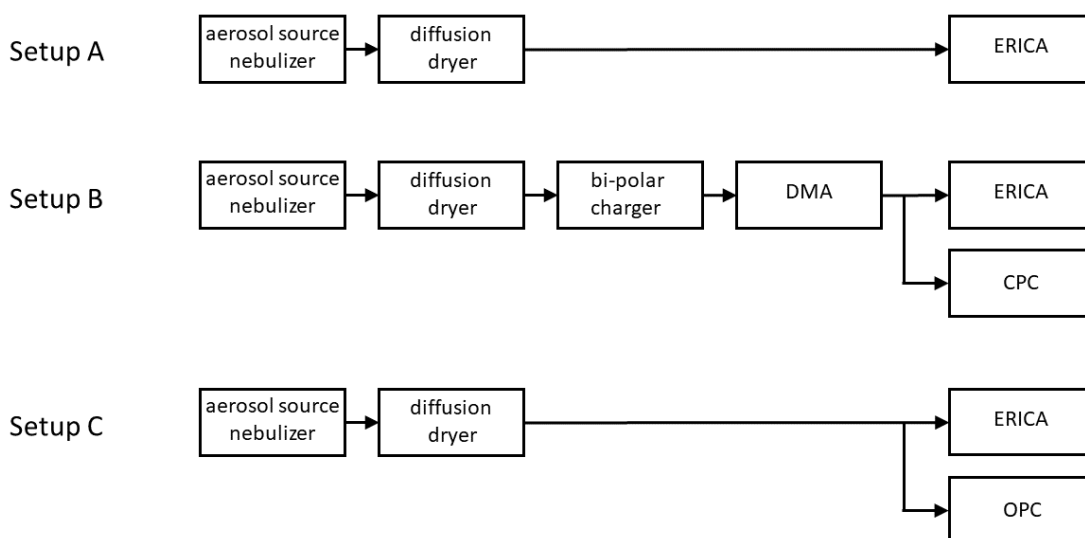

Fig. S7: Scheme of the measurement setups A, B, and C for the characterization measurements.

For further laboratory studies (see Sect. 3.5.1) also solutions of sodium chloride (Merck KGaA, Germany) and benz[a]anthracene (Sigma-Aldrich, Inc., USA), as well as a suspension of gold spheres (Sigma-Aldrich, Inc., USA;  $d_{va} = 3860$  nm; geometric diameter  $d_{geo} = 200$  nm) were nebulized. Here, Setup A (see Fig. S7) was used.

- 5 For proper concurrent operation of ERICA-LAMS and ERICA-AMS, the axial orientation of the ADL with two degrees of freedom first needs to be centered and adjusted (using AN particles) such that the particle beam actually hits the AMS vaporizer. Afterwards, the other foci from the two PDU lasers and the ellipsoidal reflectors, as well as the ablation laser optics need to be adjusted to the particle beam axis. Considering the stability requirements for aircraft operation (including flight through convective cloud outflows), this is a tedious, difficult, and time-consuming procedure with correspondingly high demands on the design and tolerances of the mechanical components as well as on the operator's skills.
- 10

For the PSL particles the vacuum aerodynamic diameter  $d_{va}$  is calculated from the NIST certified geometric diameter  $d_{geo}$  assuming a PSL density  $\rho_{PSL} = 1.05$  g cm<sup>-3</sup>, and the unit density  $\rho_o = 1$  g cm<sup>-3</sup> (Hinds, 1999; Jimenez et al., 2003a, b; DeCarlo et al., 2004):

$$d_{va} = d_{geo} \cdot \frac{\rho_{PSL}}{\rho_o} \quad (S1)$$

- 15 For the particle beam characterization measurements, a different set of PSL sizes ( $d_{va}$ ) was used (see Table S4). Here, the  $d_{va}$  was calculated from the selected electric mobility particle diameter  $d_{mob}$  to which the DMA was set (DeCarlo et al., 2004):

$$d_{va} = d_{mob} \cdot \frac{\rho_{PSL}}{\rho_o} \quad (S2)$$

AN (Merck KGaA, Germany) particles are detectable with the ERICA-LAMS as well as the ERICA-AMS units (particle sizes see Table S3). To calculate  $d_{va}$  from  $d_{mob}$  (to which the DMA was set) the particle density  $\rho_{AN}$  was assumed to be 1.725 g cm<sup>-3</sup> (Zapp et al., 2000) and the Jayne shape factor  $S$  to be 0.8 (Jayne et al., 2000).

$$d_{va} = d_{mob} \cdot S \cdot \frac{\rho_{AN}}{\rho_o} \quad (S3)$$

- 20 Table S2 lists the PSL NIST particle size standards used for particle time-of-flight calibration measurements in Sect. 3.2 and adjustment measurements. Listed are the particle sizes in geometric diameters  $d_{geo}$  (NIST certified). The vacuum aerodynamic diameters  $d_{va}$  were calculated from  $d_{geo}$ . Also, the purpose of the application is provided (labelled as X).



**Table S2: Measured PSL NIST size standards for particle size calibration measurements and particle beam characterization measurements. Listed are the particle sizes in geometric diameters  $d_{geo}$  (NIST certificate), their absolute uncertainties  $\Delta^{abs} d_{geo}$ , the calculated vacuum aerodynamic diameters  $d_{va}$ , and absolute  $\Delta^{abs} d_{va}$  and relative uncertainties  $\Delta^{rel} d_{va}$ .**

| PSL particle sizes |                                 |                   |                                |                               | Used for            |                                            |
|--------------------|---------------------------------|-------------------|--------------------------------|-------------------------------|---------------------|--------------------------------------------|
| $d_{geo}$<br>in nm | $\Delta^{abs} d_{geo}$<br>in nm | $d_{va}$<br>in nm | $\Delta^{abs} d_{va}$<br>in nm | $\Delta^{rel} d_{va}$<br>in % | Size<br>calibration | Particle beam characterization<br>with OPC |
| 76                 | 11                              | 80                | 11                             | 14                            | X                   |                                            |
| 100                | 5                               | 105               | 5                              | 5                             | X                   |                                            |
| 150                | 9                               | 158               | 9                              | 6                             | X                   |                                            |
| 198                | 7                               | 207               | 8                              | 3.7                           | X                   |                                            |
| 288                | 14                              | 302               | 15                             | 5                             | X                   |                                            |
| 356                | 14                              | 374               | 15                             | 4                             | X                   |                                            |
| 401                | 12                              | 421               | 13                             | 3                             | X                   |                                            |
| 599                | 10                              | 629               | 11                             | 1.7                           | X                   |                                            |
| 794                | 24                              | 834               | 25                             | 3                             | X                   | X                                          |
| 990                | 30                              | 1040              | 31                             | 3                             | X                   | X                                          |
| 1540               | 39                              | 1617              | 40                             | 2.5                           | X                   | X                                          |
| 1990               | 60                              | 2090              | 63                             | 3                             | X                   | X                                          |
| 2580               | 65                              | 2709              | 68                             | 2.5                           | X                   | X                                          |
| 3000               | 60                              | 3150              | 63                             | 2                             | X                   | X                                          |
| 4900               | 25                              | 5145              | 26                             | 0.5                           | X                   |                                            |

5 Table S3 lists the AN particle sizes used for particle time-of-flight calibration measurements in Sect. 3.2 and particle beam properties measurements (parameters:  $r_{eff,L}$ ,  $r_{eff,V}$ ,  $\sigma$ ,  $x_0$ , and  $A_{scan}$ ) in Sect. 3.3. The uncertainty of AN particle size  $d_{va}$  is estimated to be 3 % (Hings, 2006).

**Table S3: AN particle sizes used for size calibration measurements, particle beam characterization measurements and ADL adjustment. Listed are the particle sizes in electric mobility particle diameters  $d_{mob}$  and the calculated vacuum aerodynamic diameters  $d_{va}$ . The uncertainty of all sizes is estimated to be 3 %. X\*: results useable for evaluation of  $DE_{AMS}$  at the ERICA-AMS vaporizer only. X\*\*: results useable for evaluation of  $DE_{AN}$  at the PDUs only.**

10

| AN particle diameter |                 | Used for         |                                                                                   |
|----------------------|-----------------|------------------|-----------------------------------------------------------------------------------|
| $d_{va}$ in nm       | $d_{mob}$ in nm | Size calibration | Particle beam characterization and<br>detection efficiency determination with DMA |
| 91                   | 66              |                  | X*                                                                                |
| 138                  | 100             | X                | X*                                                                                |
| 177                  | 128             | X                |                                                                                   |
| 213                  | 154             | X                | X                                                                                 |
| 276                  | 200             | X                |                                                                                   |
| 297                  | 215             | X                | X                                                                                 |
| 335                  | 243             | X                | X                                                                                 |
| 483                  | 350             | X                | X**                                                                               |
| 548                  | 397             | X                | X**                                                                               |
| 814                  | 590             | X                | X**                                                                               |

Table S4 lists the PSL NIST particle size standards used for particle beam properties measurements (parameters:  $r_{eff,L}$ ,  $\sigma$ ,  $x_0$ , and  $A_{scan}$ ) in Sect. 3.3. Listed are the particle sizes in geometric diameter  $d_{geo}$  (NIST certificate) and in vacuum aerodynamic diameter  $d_{va}$ , calculated from the set electric mobility diameter  $d_{mob}$ .

5 **Table S4: PSL NIST size standards for particle beam characterization measurements. Particle sizes in electric mobility particle diameters  $d_{mob}$ , geometric diameters  $d_{geo}$  (NIST certificate), absolute uncertainties  $\Delta^{abs}d_{geo}$ , the calculated vacuum aerodynamic diameters  $d_{va}$ , and absolute  $\Delta^{abs}d_{va}$  and relative uncertainties  $\Delta^{rel}d_{va}$ . Also, the electric mobility diameters values  $d_{mob}$  to which the DMA was set are listed.**

| $d_{geo}$ in nm | $\Delta^{abs}d_{geo}$ in nm | $d_{va}$ in nm | $\Delta^{abs}d_{va}$ in nm | $\Delta^{rel}d_{va}$ in nm | $d_{mob}$ in nm |
|-----------------|-----------------------------|----------------|----------------------------|----------------------------|-----------------|
| 103             | 14                          | 108            | 15                         | 14                         | 105             |
| 208             | 7                           | 218            | 8                          | 4                          | 225             |
| 390             | 12                          | 410            | 13                         | 3                          | 405             |
| 599             | 12                          | 629            | 13                         | 2                          | 585             |
| 794             | 27                          | 834            | 28                         | 3                          | 795             |

Fig. S8 shows the histograms of the PSL calibration measurements (Sect. 3.2), where the different sizes can be clearly distinguished. Only the peak of the PSL particles with 105 nm in size overlaps with that of the measurement of the PSL particles with 80 nm in size. In order to find the center of the peaks, which were used as  $upc$  value for calibration, a Gaussian distribution curve was fitted to the individual histograms in Fig. S8.

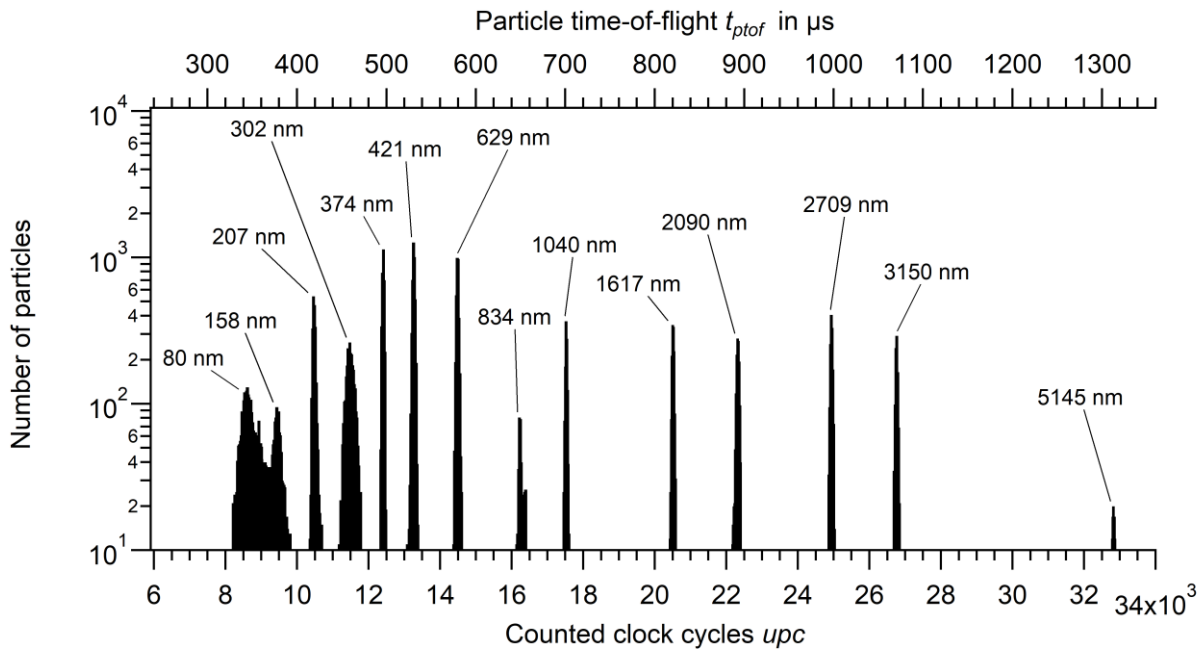

15

**Fig. S8: Combined histograms of the PSL calibration measurements (particle sizes are expressed as  $d_{va}$ ). The particle flight time  $t_{ptof}$  (top abscissa) was calculated from the counted clock cycles (40 ns per cycle; bottom abscissa). The peak of  $d_{va} = 105$  nm particles overlaps with the broad peak of  $d_{va} = 80$  nm particles and is not visible in the graph.**

## S4 Particle detection efficiency

### S4.1 Calculation of the relative Mie scattered light intensity

For the measurement with PSL particles of 108 nm in size, the parameter  $r_{eff,L}$  could not be determined by the combined curve-fitting procedure, due to losses between PDU1 and PDU2 (see Sect. 3.3.1). The combined curve-fitting for the measurements with AN particles of 138 nm in size yielded unreasonably high values for both PDUs despite the seemingly reasonable curve progression. (see Sect. S4.2). However,  $r_{eff,L}$  alternatively can be determined by means of the relative Mie scattered light intensity.

#### S4.1.1 Calculation of the effective laser radius for PSL particles of $d_{va} = 108$ nm in size

As described in Sect. 3.3.1, the curve fitting of the measurement with PSL particles of  $d_{va} = 108$  nm ( $d_{geo} = (103 \pm 14)$  nm) was not performed by the combined curve-fitting procedure, i.e., the parameter  $A_{scan}$  was not linked, because the large divergence of the particle beam will introduce losses at PDU2 and thus the assumption of having the same  $A_{scan}$  is not applicable.  $A_{scan}$  and  $r_{eff,L}$  strongly correlate already for PDU1. Thus  $r_{eff,L}$  has to be kept fixed at a value acquired using Mie Theory of light scattering. This was evident from the fact that the combined curve-fitting procedure of the measurement does not converge with respect to  $r_{eff,L}$  and  $A_{scan}$ . The relative Mie scattered light intensity  $I_{rel}$  was calculated (Bohren and Huffman, 1998) by means of the program “BH-Mie-Rechner” programmed by Vetter (2004). Here, the wavelength of the used detection laser ( $\lambda = 405$  nm) and the refractive index for PSL particles  $n_{PSL}$  of approximately 1.65 (for  $\lambda = 405$  nm; real part; see supplemental information of Galpin et al. (2017)) were considered. In addition, the detector angle range was considered to be  $14^\circ - 164^\circ$ , the detector angle interval  $1^\circ$ , and the detector to particle distance 4.9 cm.

The relative Mie scattered intensity  $I_{rel}$  is the Mie scattered light intensity  $I_{sc}$  normalized to the irradiated intensity  $I_{ir}$  (Equation (S4)).

$$I_{rel} = I_{sc}/I_{ir} \quad (S4)$$

By that, for PSL particles of  $d_{geo} = 104$  nm a Mie scattering intensity of  $I_{rel,104nm} = 7.10 \cdot 10^{-4}$  a.u. and for PSL particles of  $d_{geo} = 208$  nm  $I_{rel,208nm} = 3.42 \cdot 10^{-2}$  a.u. was calculated.

The curve fitting of the ADL position scan with PSL particles with a size of  $d_{geo} = 208$  nm ( $d_{va} = 218$  nm) resulted an effective laser radius  $r_{eff,L} = 148$   $\mu$ m for PDU1 and  $r_{eff,L} = 133$   $\mu$ m for PDU2, considering the geometry of the instrument (see Sect. S1.2). The effective laser width  $r_{eff,L}$  is a multiple (by factor  $a_t$ ) of the beam waist  $1/e^2$ -radius  $w_0 = 30.3$   $\mu$ m (see Sect. 3.1):

$$r_{eff,L} = a_t \cdot w_0 \quad (S5)$$

The factor  $a_t$  is in average (mean of  $a_{t,208nm}$  at PDU1 and  $a_{t,208nm}$  at PDU2)  $a_{t,208nm} = 4.687$  for PSL particles with a size of  $d_{geo} = 208$  nm. The radius  $r$  is the radius at the limit of detection  $r_{eff,L}$  ( $r = r_{eff,L}$ ).

The detection limit is the same for both particle sizes:

$$I_{sc,208nm} = I_{sc,104nm} \quad (S6)$$

As follows from Equation (S4) and (S6)

$$I_{ir,208nm}(r_{208nm}) \cdot I_{rel,208nm} = I_{ir,104nm}(r_{104nm}) \cdot I_{rel,104nm} \quad (S7)$$

Considering a Gaussian laser profile (Eichler et al., 2016)

$$I(r) = I_0 \cdot \exp\left[-\frac{2r^2}{w_0^2}\right] \quad (S8)$$

where  $r$  is assumed as the edge of  $r_{eff,L}$  and  $I_0$  is the intensity in the center of the laser beam. Thus,  $I_{ir}(a_t)$  is the intensity at the edge of  $r_{eff,L}$

$$I_{ir}(a_t) = I_0 \cdot \exp[-2 a_t^2] \quad (S9)$$

Inserted in Equation (S7):

$$I_{0,208nm} \cdot \exp[-2 a_{t,208nm}^2] \cdot I_{rel,208nm} = I_{0,104nm} \cdot \exp[-2 a_{t,104nm}^2] \cdot I_{rel,104nm} \quad (S10)$$

The same laser and thus the same laser intensity in the center for both particle sizes is considered by

$$I_{0,208nm} = I_{0,104nm} \quad (S11)$$

5 Solving Equation (S10) for  $a_{104nm}$ :

$$a_{t,104nm} = \sqrt{a_{t,208nm}^2 - \frac{1}{2} \ln \left[ \frac{I_{rel,208nm}}{I_{rel,104nm}} \right]} = 4.476 \quad (S12)$$

After entering the values for the calculated parameters  $a_{t,208nm}$ ,  $I_{rel,208nm}$ , and  $I_{rel,104nm}$  in Equation (S12), the result for factor  $a_{t,104nm}$  is 4.476.

To calculate the factor  $f_{Mie,104nm}$  that is used to calculate  $r_{eff,L,104nm}$  out of  $r_{eff,L,208nm}$ , Equation (S13) is used.

$$f_{Mie,104nm} = \frac{r_{eff,L,104nm}}{r_{eff,L,208nm}} = \frac{a_{t,104nm} \cdot w_0}{a_{t,208nm} \cdot w_0} = 0.955 \quad (S13)$$

Using that determined value for  $f_{Mie,104}$ , the  $r_{eff,L}$  value for  $d_{geo} = 104$  nm ( $d_{va} = 108$  nm) is  $r_{eff,L} = 320$   $\mu$ m at PDU1 and  $r_{eff,L} = 136$   $\mu$ m at PDU2. The uncertainties are conservatively estimated as 4.8  $\mu$ m at PDU1 and 4.0  $\mu$ m at PDU2. These values are the approximated maximum uncertainties of  $r_{eff,L}$  in the considered particle size range of  $d_{va} = 218$  nm to  $d_{va} = 834$  nm at PDU1 and PDU2. The values, shown in Fig. 6, are  $r_{eff,L} = 141$   $\mu$ m at PDU1 and  $r_{eff,L} = 127$   $\mu$ m at PDU2 with the uncertainties of 2  $\mu$ m at PDU1 and 4  $\mu$ m at PDU2.

#### S4.1.2 Calculation of the effective laser radius for AN particles of $d_{va} = 138$ nm and $d_{va} = 91$ nm in size

15 Analogous to the calculation of the factor for the determination of the  $r_{eff,L}$  values for the measurement with smaller PSL particles (see Sect. S4.1.1), the factors for the measurements with AN particles with the sizes of  $d_{va} = 138$  nm ( $d_{geo} = 100$  nm) and  $d_{va} = 91$  nm ( $d_{geo} = 66$  nm) were also determined. The starting point was the  $r_{eff,L}$  values of PDU1 and PDU2 determined by means of the combined curve-fitting procedure when measuring with  $d_{va} = 213$  nm ( $d_{geo} = 154$  nm).

20 The calculation of the relative Mie scattered light intensity  $I_{rel}$  was performed for different refractive indices between  $n = 1.30$  and  $n = 1.70$ . The refractive index of particulate AN particles at a wavelength of  $\lambda = 405$  nm is unknown but was assumed to be in that range. For the calculation of  $I_{rel}$ , the wavelength of the used detection laser ( $\lambda = 405$  nm), the detector angle range of  $14^\circ - 164^\circ$ , the detector angle interval of  $1^\circ$ , and the detector to particle distance of 4.9 cm was considered.

##### S4.1.2.1 Effective laser radius for ammonium nitrate particles of $d_{va} = 138$ nm

25 The curve fitting of the ADL position scan with AN particles of  $d_{geo} = 154$  nm ( $d_{va} = 213$  nm) resulted in an effective laser radius of  $r_{eff,L,SC} = 89$   $\mu$ m for PDU1 and  $r_{eff,L,SC} = 87$   $\mu$ m for PDU2, considering the geometry of the instrument (see Sect. S1.2).

30 The factor  $a_t$  (see Eq. (S5)) is in average (mean of  $a_{t,154nm}$  at PDU1 and  $a_{t,154nm}$  at PDU2)  $a_{t,154nm} = 2.911$  for AN particles of  $d_{geo} = 154$  nm. The beam waist  $1/e^2$ -radius  $w_0$  is 30.3  $\mu$ m (see Sect. 3.1). To calculate  $a_{t,100nm}$ , Eq. (S12) is used, where  $a_{t,104nm}$  is substituted by  $a_{t,100nm}$ ,  $a_{t,208nm}$  by  $a_{t,154nm}$ ,  $I_{rel,104nm}$  by  $I_{rel,100nm}$ , and  $I_{rel,208nm}$  by  $I_{rel,154nm}$ . The factor  $f_{Mie,100nm}$  is calculated using Eq. (S13), where  $f_{Mie,104nm}$  is substituted by  $f_{Mie,100nm}$ ,  $a_{t,104nm}$  is substituted by  $a_{t,100nm}$ , and  $a_{t,208nm}$  by  $a_{t,154nm}$ . The results for the various refractive indices are shown in Table S5.

**Table S5: Calculated factors to calculate the  $r_{eff,L}$  values for the measurement with AN particles of  $d_{geo} = 100$  nm ( $d_{va} = 138$  nm).**

| $n$  | $I_{rel,154nm}$ in a.u. | $I_{rel,100nm}$ in a.u. | $a_{t,100nm}$ | $f_{Mie,100nm}$ |
|------|-------------------------|-------------------------|---------------|-----------------|
| 1.70 | $7.579 \cdot 10^{-3}$   | $6.427 \cdot 10^{-4}$   | 2.691         | 0.924           |
| 1.60 | $5.596 \cdot 10^{-3}$   | $4.848 \cdot 10^{-4}$   | 2.693         | 0.925           |
| 1.50 | $3.901 \cdot 10^{-3}$   | $3.443 \cdot 10^{-4}$   | 2.695         | 0.926           |
| 1.40 | $2.494 \cdot 10^{-3}$   | $2.243 \cdot 10^{-4}$   | 2.697         | 0.926           |
| 1.30 | $1.391 \cdot 10^{-3}$   | $1.277 \cdot 10^{-4}$   | 2.699         | 0.927           |

The average of the factors is  $f_{Mie,100nm} = 0.926$ . Using that average factor, the  $r_{eff,L,SC}$  value for  $d_{geo} = 100$  nm ( $d_{va} = 138$  nm) is 83  $\mu$ m at PDU1 and 81  $\mu$ m at PDU2 with the conservatively estimated uncertainties of 9  $\mu$ m at PDU1 and 14  $\mu$ m at PDU2 (see Fig. 6). These uncertainty values are the approximated maximum uncertainties in the considered size range of  $d_{va} = 213$  nm to  $d_{va} = 814$  nm, as determined by the curve-fitting procedure.

#### S4.1.2.2 Effective laser radius for ammonium nitrate particles of $d_{va} = 91$ nm

The calculation of the  $r_{eff,L}$  for AN particles of  $d_{va} = 91$  nm was conducted similar to the calculation of  $r_{eff,L}$  for particles of  $d_{va} = 138$  nm (see Sect. S4.1.2.1): The curve fitting of the ADL position scan with AN particles of  $d_{geo} = 154$  nm ( $d_{va} = 213$  nm) resulted an  $r_{eff,L,SC} = 89$   $\mu$ m for PDU1 and  $r_{eff,L,SC} = 87$   $\mu$ m for PDU2, considering the geometry of the instrument.

The factor  $a_t$  (see Eq. (S5)) is in average (mean of  $a_{t,154nm}$  at PDU1 and  $a_{t,154nm}$  at PDU2)  $a_{t,154nm} = 2.911$  for AN particles of  $d_{geo} = 154$  nm. The beam waist  $1/e^2$ -radius  $w_0$  is 30.3  $\mu$ m (see Sect. 3.1). To calculate  $a_{t,66nm}$ , Eq. (S12) is used, where  $a_{t,104nm}$  is substituted by  $a_{t,66nm}$ ,  $a_{t,208nm}$  by  $a_{t,154nm}$ ,  $I_{rel,104nm}$  by  $I_{rel,66nm}$ , and  $I_{rel,208nm}$  by  $I_{rel,154nm}$ . The factor  $f_{Mie,66nm}$  is calculated using Eq. (S13), where  $f_{Mie,104nm}$  is substituted by  $f_{Mie,66nm}$ ,  $a_{t,104nm}$  is substituted by  $a_{t,66nm}$ , and  $a_{t,208nm}$  by  $a_{t,154nm}$ . The results for the various refractive indices are shown in Table S6.

**Table S6: Calculated factors to calculate the  $r_{eff,L}$  values for the measurement with AN particles of  $d_{geo} = 66$  nm ( $d_{va} = 91$  nm).**

| $n$  | $I_{rel,154nm}$ in a.u. | $I_{rel,66nm}$ in a.u. | $a_{t,66nm}$ | $f_{Mie,66nm}$ |
|------|-------------------------|------------------------|--------------|----------------|
| 1.70 | $7.579 \cdot 10^{-3}$   | $5.158 \cdot 10^{-5}$  | 2.446        | 0.840          |
| 1.60 | $5.596 \cdot 10^{-3}$   | $3.968 \cdot 10^{-5}$  | 2.450        | 0.841          |
| 1.50 | $3.901 \cdot 10^{-3}$   | $2.877 \cdot 10^{-5}$  | 2.454        | 0.843          |
| 1.40 | $2.494 \cdot 10^{-3}$   | $1.914 \cdot 10^{-5}$  | 2.458        | 0.844          |
| 1.30 | $1.391 \cdot 10^{-3}$   | $1.114 \cdot 10^{-5}$  | 2.462        | 0.846          |

The average of the factors is  $f_{Mie,66nm} = 0.843$ . Using that average factor, the  $r_{eff,L,SC}$  value for  $d_{geo} = 66$  nm ( $d_{va} = 91$  nm) is  $r_{eff,L,SC} = 75$   $\mu$ m at PDU1 and  $r_{eff,L,SC} = 73$   $\mu$ m at PDU2 with the uncertainties of 9  $\mu$ m at PDU1 and 14  $\mu$ m at PDU2 (see Fig. 6). These uncertainty values are the approximated maximum uncertainties in the considered size range of  $d_{va} = 213$  nm to  $d_{va} = 814$  nm, as determined by the curve-fitting procedure.

#### 25 S4.2 Experimental determination of detection efficiencies for particles carrying single or double electrical charges

In addition to the particle detection efficiency for PSL particles, the detection efficiency of particle counting at both detection units PDUs was determined for AN particles (particle sizes see Table S2) according to Eq. (4). For this, a newly developed approach was adopted. An example of the AN particle measurement at the PDUs is provided in Sect. S4.4. For polydisperse

aerosol (like nebulized and dried AN), not only singly charged particles pass through the DMA, but also larger particles with higher charges having the same electric mobility  $Z$  (Allen and Raabe, 1985; Seinfeld and Pandis, 2016). Besides the singly charged (SC), the doubly charged (DC) particles have to be considered when using a DMA for size selection out of a polydisperse aerosol. The fraction of triply or higher charged particles is negligible in the investigated size range (Wiedensohler, 1988). Since the determined parameters  $r_{eff,L}$ ,  $x_0$ ,  $\sigma$ , and  $A_{scan}$  show a size dependency in the results of an ADL position scan, the doubly charged particles have to be taken into consideration.

Table S7 shows the measured sizes of the singly charged particles  $d_{va}$  and the sizes of the doubly charged particles  $d_{va,DC}$ . Each line in the table represents the sizes of the same electrical mobility  $Z$ . For example, when the voltage at the DMA is set to allow singly charged particles of 91 nm in size, a doubly charged particle fraction  $f_{DC}$  of 0.113 of AN particles of 138 nm in size will pass as well. Two series of measurements (SOM A and SOM B, Table S7) were carried out with complementary particle sizes. Within a SOM, the particle size of the species with single charge  $d_{va}$ , e.g.,  $d_{va} = 138$  nm, also corresponds to the particle size of the species with double charge  $d_{va,DC}$ , i.e.,  $d_{va,DC} = 138$  nm, for the next smaller species with single charge  $d_{va}$ , i.e.,  $d_{va} = 91$  nm. This approach enables an iterative procedure for the following evaluation. The fraction of doubly charged particles  $f_{DC}$  depends on the particle size and the deployed nebulizer. The calculation of the used values for the singly charged fraction  $f_{SC}$  and  $f_{DC}$ , is given in Sect. S4.3. The highest fraction of doubly charged particles can be obtained for a particle size of  $d_{va} = 138$  nm (0.123).

**Table S7: Singly charged (SC) particles of sizes  $d_{va}$  and the corresponding doubly charged (DC) particles  $d_{va,DC}$  with the same electrical mobility value. Provided in addition are the corresponding fractions of singly  $f_{SC}$  and doubly charged  $f_{DC}$  particles for the two series of measurements (SOM) A and B.**

| $d_{va}$ singly charged (SC) particles<br>in nm | $d_{va,DC}$ doubly charged (DC) particles<br>in nm | $f_{SC}$ | $f_{DC}$ | SOM |
|-------------------------------------------------|----------------------------------------------------|----------|----------|-----|
| 91                                              | 138                                                | 0.887    | 0.113    | A   |
| 138                                             | 213                                                | 0.877    | 0.123    |     |
| 213                                             | 335                                                | 0.892    | 0.108    |     |
| 335                                             | 548                                                | 0.937    | 0.063    |     |
| 548                                             | 934                                                | 1.000    | 0.000    |     |
| 297                                             | 483                                                | 0.964    | 0.036    | B   |
| 483                                             | 814                                                | 0.982    | 0.018    |     |
| 814                                             | 1435                                               | 1.000    | 0.000    |     |

20

In order to incorporate the doubly charged particles during the curve-fitting, Eq. (5) was extended by a term for the doubly charged particles to form Eq. (S14). The parameters subscripted with SC refer to the singly charged particles, the parameters subscripted with DC refer to the doubly charged particles:

$$\begin{aligned}
 DE_{AN}(x_{pos}) = & \\
 & \left( \frac{1}{2} \cdot \left( erf \left( \frac{x_{pos} + r_{eff,L,SC} - x_{0,SC}}{\sqrt{2} \sigma_{SC}} \right) - erf \left( \frac{x_{pos} - r_{eff,L,SC} - x_{0,SC}}{\sqrt{2} \sigma_{SC}} \right) \right) \cdot A_{scan,SC} \cdot f_{SC} \right) \\
 & + \left( \frac{1}{2} \cdot \left( erf \left( \frac{x_{pos} + r_{eff,L,DC} - x_{0,DC}}{\sqrt{2} \sigma_{DC}} \right) - erf \left( \frac{x_{pos} - r_{eff,L,DC} - x_{0,DC}}{\sqrt{2} \sigma_{DC}} \right) \right) \cdot A_{scan,DC} \cdot f_{DC} \right)
 \end{aligned} \quad (S14)$$

The parameters were determined iteratively with the procedure outlined in Fig. S9. The iteration series was started at the largest particle size in the respective SOM (A or B). For SOM A this is 548 nm, for SOM B it is 814 nm. For the first iteration,  $f_{DC} = 0$  is assumed in each case, since it based on the fact that particles larger than 1000 nm ( $d_{va,DC}$ ) are delivered by the aerosol

25

generator. Then, in analogy to the procedure for the measurements with PSL particles, a combined curve-fitting, here for AN with Eq. (S14), was carried out. The parameters  $x_{0,SC}$ ,  $\sigma_{SC}$ ,  $r_{eff,L,SC}$ , and  $A_{scan,SC}$  obtained in each case are used in the next iteration step as constants for the doubly charged species as  $x_{0,DC}$ ,  $\sigma_{DC}$ ,  $r_{eff,L,DC}$ , and  $A_{scan,DC}$ .

Example for SOM A: For the combined curve-fitting, the constants for  $f_{SC}$  and  $f_{DC}$  in Eq. (S14) are used separately for both PDUs. The first iteration starts with AN particles of 548 nm in size. According to Table S7, the second half of the term in Eq. (S14) then is zero. The variables  $x_{0,SC}$ ,  $\sigma_{SC}$ ,  $r_{eff,L,SC}$ , and  $A_{scan,SC}$  obtained from this iteration are used as constants  $x_{0,DC}$ ,  $\sigma_{DC}$ ,  $r_{eff,L,DC}$ , and  $A_{scan,DC}$  for the second iteration for the measurement at particle size of 335 nm. The iteration series of SOM A ends with the measurement of AN particles of 91 nm in size.

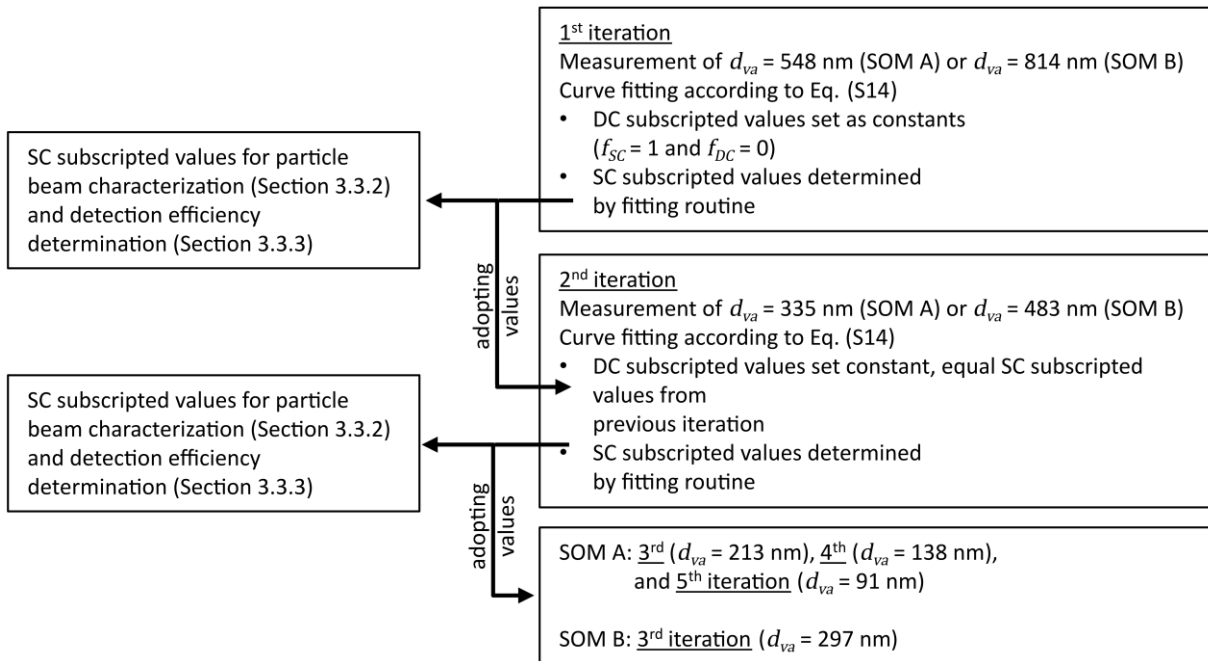

10 **Fig. S9: Iteration scheme for SOM A and SOM B using Eq. (S14) for the combined curve-fitting. SC: Singly Charged; DC: Doubly Charged.**

The combined curve-fitting for the measurements with AN particles of 138 nm in size yielded unreasonably high values for both PDUs despite the seemingly reasonable curve progression. Therefore, an approach analogous to the measurements with PSL particles with a size of 108 nm was applied (see Sect. S4.1.2). Based on known  $r_{eff,L,SC}$  values at PDU1 and PDU2 for the measurements with AN particles of 213 nm, the  $r_{eff,L,SC}$  values for the measurements with AN particles of 138 nm were calculated by a factor using the relative intensity of Mie scattering. A new combined curve-fitting (fourth iteration of SOM A, see Fig. S9) yielded values for  $x_{0,SC}$ ,  $\sigma_{SC}$ , and  $A_{scan,SC}$  for the particle size 138 nm, where  $r_{eff,L,SC}$  was kept constant. However, the evaluation revealed contradictory results (calculated high values for  $S_{detect}$  but low values for  $DE_{max}$ ) due to a strong dependence on the exact amount of doubly charged particles. Thus, the results of these curve-fits are not included in the further evaluation.

The values of these three parameters (i.e.  $x_{0,SC}$ ,  $\sigma_{SC}$ , and  $A_{scan,SC}$ ) were used in the fifth iteration of the SOM A ( $d_{va} = 91$  nm, see Fig. S9) together with a value for  $r_{eff,L,SC}$ , which was also obtained using relative intensity of Mie scattering for calculation. For this particle size, the curve-fitting was performed individually for the measurement on PDU1 and PDU2. Since the curve-fitting of the measurement at PDU1 showed three peaks and the curve-fitting of the measurement at PDU2 delivered unreasonably high values, the results of these both fits are not included in the further evaluation.

Simultaneously to the measurements with AN particles at the detection units PDU1 and PDU2 of the ERICA-LAMS, the mean mass concentration of AN  $\bar{C}_{NO_3}$  was also determined with the ERICA-AMS (Setup B, see Fig. S7) and additionally, as a reference, the mean particle number concentration  $\bar{c}_{ref}$  was measured with the CPC (methodology similar to Liu et al. (2007)). An example is provided in Fig. S11. The detection efficiency of the particle mass detection at the ERICA-AMS  $DE_{vaporizer}$  is given by:

$$DE_{vaporizer} = \frac{\bar{C}_{NO_3}}{\frac{1}{6} \cdot \pi \cdot \rho_{AN} \cdot S \cdot \bar{c}_{ref} \cdot \left( (d_{mob}^3 \cdot f_{SC}) + (d_{mob,DC}^3 \cdot f_{DC}) \right)} \quad (S15)$$

Here,  $\rho_{AN}$  is the density of AN,  $S$  is the Jayne shape factor and  $d_{mob}$  is the mobility diameter set at the DMA. This can be converted into the vacuum aerodynamic diameter  $d_{va}$  (see Eq. (S3)), which is used hereafter. Furthermore, the fractions of singly and doubly charged particles,  $f_{SC}$  and  $f_{DC}$ , are considered (see Table S7).

Similar to the measurements on the detection units, the particle beam parameters were obtained by curve-fittings. For these, Eq. (S16) was used. As in Eq. (S14),  $f_{SC}$  and  $f_{DC}$  were considered. However, the detection efficiency at the ERICA-AMS vaporizer does not depend on the effective laser radius ( $r_{eff,L,SC}$  and  $r_{eff,L,DC}$ ), but on the effective vaporizer radius ( $r_{eff,V,SC}$  and  $r_{eff,V,DC}$ ). This is the area where particles get vaporized in such a degree that enough ions are accelerated into the mass spectrometer to generate a detectable signal at the MCPs.

$$DE_{AMS}(x_{pos}) = \left( \frac{1}{2} \cdot \left( erf \left( \frac{x_{pos} + r_{eff,V,SC} - x_{0,SC}}{\sqrt{2} \sigma_{SC}} \right) - erf \left( \frac{x_{pos} - r_{eff,V,SC} - x_{0,SC}}{\sqrt{2} \sigma_{SC}} \right) \right) \cdot A_{scan,SC} \cdot f_{SC} \right) + \left( \frac{1}{2} \cdot \left( erf \left( \frac{x_{pos} + r_{eff,V,DC} - x_{0,DC}}{\sqrt{2} \sigma_{DC}} \right) - erf \left( \frac{x_{pos} - r_{eff,V,DC} - x_{0,DC}}{\sqrt{2} \sigma_{DC}} \right) \right) \cdot A_{scan,DC} \cdot f_{DC} \right) \quad (S16)$$

The procedure for determining the individual parameters  $x_{0,SC}$ ,  $\sigma_{SC}$ ,  $r_{eff,V,SC}$ , and  $A_{scan,SC}$  is the same iterative procedure as for the measurements at the detection units PDU1 and PDU2 (see Fig. S9) with Eq. (S16) instead of Eq. (S14). The curve-fitting of the measurement at the particle size of 91 nm only provided reasonable values if the value for  $r_{eff,V,SC} = 1.98$  mm was kept constant during the curve-fitting. This value was determined by averaging the  $r_{eff,V,SC}$  values of the measurements for the four larger particle sizes (138 nm to 335 nm). The results of the curve-fittings for particle sizes larger than 335 nm are not suitable for further evaluation, although the measurements are meaningful in terms of amplitude and shape. As the particle beam emerges into the vacuum chamber from the ADL together with a residual air stream, the largest beam spread can be expected for the smallest particles, i.e., those sizes which are covered here. In the case of ADL position scan measurements, either at the PDUs or at the ERICA-AMS vaporizer, assuming a flat-top curve, i.e., a plateau, for an ADL position scan, the parameter  $A_{scan}$  is strongly correlated either with the effective laser radius,  $r_{eff,L}$  or  $r_{eff,L,SC}$ , or with the effective vaporizer radius  $r_{eff,V,SC}$ . A plateau indicates a narrow particle beam with respect to the effective widths. In Sect. 3, only the SC subscripted values  $r_{eff,L,SC}$ ,  $r_{eff,V,SC}$ ,  $\sigma_{SC}$ ,  $x_{0,SC}$ , and  $A_{scan,SC}$  from the AN measurements (Eqs. (S14) and (S16)) were used for presentation (without subscript SC).



### S4.3 Determination of the singly and doubly charged particle fraction

The parameters  $f_{SC}$  and  $f_{DC}$ , used for the fitting routines (according to Eqs. (S14) and (S16)) and the calculation of  $DE_{vaporizer}$  (according to Eq. (S15)), are determined by CPC measurements during the experiments. Here, the ratio of the charge fraction of doubly charged (DC) particles to singly charged (SC) particles (DC charge fraction/SC charge fraction)  $\varphi$  for the respective particle size was adopted. The values of the DC charge fraction and the SC charge fraction were read out from Tigges et al. (2015).

The procedure is iterative, starting with the second largest scan number  $s$  ( $s = 4$  in SOM A and  $s = 2$  in SOM B; see Table S8). For the largest particle sizes used here ( $s = 5$  in SOM A and  $s = 3$  in SOM B) it is assumed that  $f_{DC} = 0$  and  $f_{SC} = 1$ , since particle sizes larger than 1000 nm are only produced in very low numbers.

10 The parameter  $f_{DC,s}$  is the  $f_{DC}$  value for the scan number  $s$  and is iteratively calculated separately for each SOM:

$$f_{DC,s} = \frac{c_{DC,s}}{\bar{c}_{tot,s}} = \frac{\varphi_{s+1} \cdot c_{SC,s+1}}{\bar{c}_{tot,s}} \quad (S17)$$

Here,  $f_{DC,s}$  is the fraction of the doubly charged particles,  $\varphi_{s+1}$  is the DC charge fraction to SC charge fraction ratio for scan number  $s + 1$ , read out from Tigges et al. (2015),  $c_{DC,s}$  is the number concentration of the doubly charged particles for scan number  $s$ ,  $c_{SC,s+1}$  is the number concentration of the singly charged particles for scan number  $s + 1$ , and  $\bar{c}_{tot,s}$  is the average of the total CPC number concentration for scan number  $s$ .

15  $c_{SC,s+1}$  cannot be measured directly. Since no higher than double charges have to be considered:

$$c_{SC,s+1} = (\bar{c}_{tot,s+1} - c_{DC,s+1}) \quad (S18)$$

Here,  $c_{DC,s+1}$  is the number concentration of the doubly charged particles for scan number  $s + 1$ , and  $\bar{c}_{tot,s+1}$  is the average of the total CPC number concentration for scan number  $s + 1$ .

**Table S8: Scan numbers  $s$  of the measured AN particles for various particle sizes of singly charged species (SC)  $d_{va}$ , the corresponding DC charge fraction /SC charge fraction ratios  $\varphi$  according to Tigges et al. (2015), and the calculated fractions of singly  $f_{SC}$  and doubly charged  $f_{DC}$  particles for the two series of measurements (SOM) A and B.**

20

| scan number $s$ | $d_{va}$ in nm | $\varphi$ | $f_{SC}$ | $f_{DC}$ | SOM |
|-----------------|----------------|-----------|----------|----------|-----|
| 1               | 91             |           | 0.887    | 0.113    | A   |
| 2               | 138            | 0.171     | 0.877    | 0.123    |     |
| 3               | 213            | 0.302     | 0.892    | 0.108    |     |
| 4               | 335            | 0.460     | 0.937    | 0.063    |     |
| 5               | 548            | 0.631     | 1.000    | 0.000    |     |
|                 |                |           |          |          |     |
| 1               | 297            |           | 0.964    | 0.036    | B   |
| 2               | 483            | 0.585     | 0.982    | 0.018    |     |
| 3               | 814            | 0.747     | 1.000    | 0.000    |     |

Since no higher than double charges have to be considered, the value for  $f_{SC}$  of the size number  $s$  ( $f_{SC,s}$ ) is:

$$f_{SC,s} = 1 - f_{DC,s} \quad (S19)$$

The results for the respective values according to the scan number  $s$  for  $f_{SC}$  and  $f_{DC}$  are summarized in Table S8 and transferred to Table S7.

25

#### S4.4 ADL position scans with ammonium nitrate (AN) particles

Fig. S10 exemplarily displays the AN particle beam characterization measurement with particles of 297 nm in size at PDU1 including the curve fit pursuant Eq. (S14) (solid line). The parameters indexed with DC ( $x_{0,DC}$ ,  $\sigma_{DC}$ ,  $r_{eff,DC}$ , and  $A_{scan,DC}$  shown in the box resulted from the curve fitting with particle size of 483 nm, which contribute as doubly charged particles. The bars for the uncertainty of the detection efficiency  $DE_{PDU}$  are based on counting statistics of the PDU and the CPC. The uncertainties of the curve fitting results of  $x_{0,DC}$ ,  $\sigma_{DC}$ ,  $r_{eff,DC}$ ,  $A_{scan,DC}$ ,  $f_{SC}$ , and  $f_{DC}$  appear as 0, because during curve fitting routine they were kept as constants.

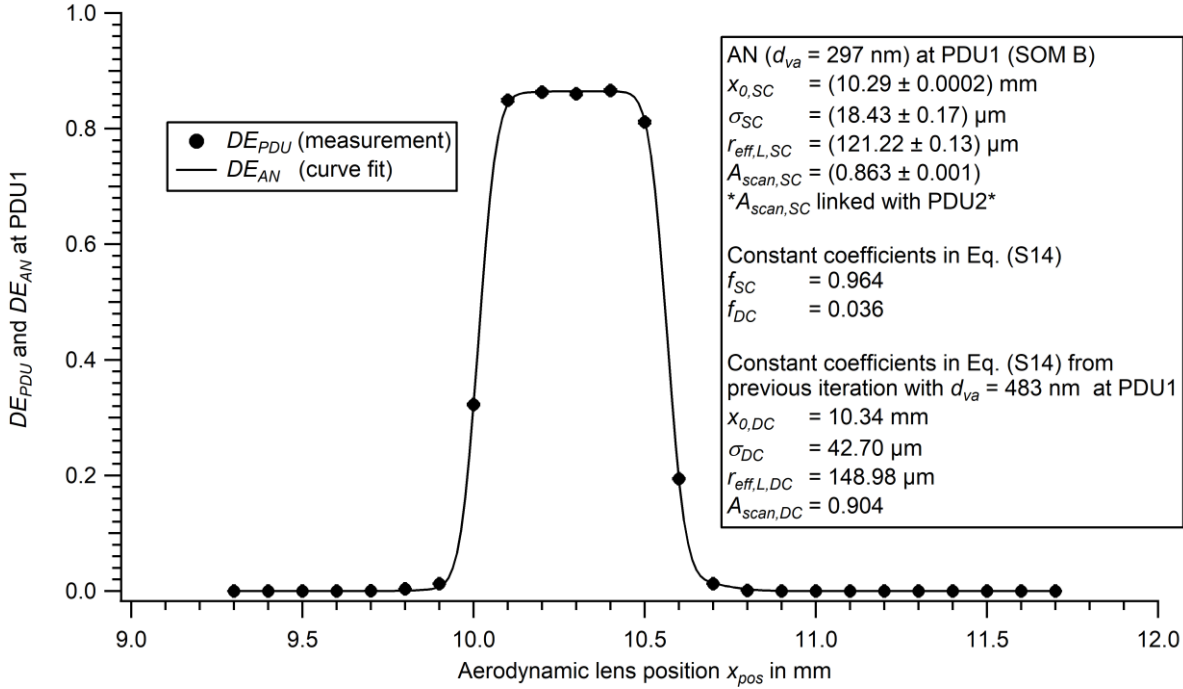

10 Fig. S10: Scan of the ADL position ( $x_{pos}$ ) with AN particles of  $d_{va} = 297$  nm perpendicular to the laser beam at PDU1. Displayed are the  $DE_{PDU}$  values of the measurement (markers) according to Eq. (4) and the curve fit ( $DE_{AN}$ ; line) according to Eq. (S14). The results and constants of the curve fits are shown in the text box. The values of  $\sigma_{SC}$ ,  $\sigma_{DC}$ ,  $r_{eff,L,SC}$ , and  $r_{eff,L,DC}$  were rescaled according to the instrument's geometry (see Sect. S1.2), using the intercept theorem. The uncertainty of the detection efficiency is based on counting statistics of the PDU and the CPC and the uncertainty of the lens position results from reading errors. The uncertainty bars are in all cases smaller than the symbol.

15 Fig. S11 shows the detection efficiency  $DE_{vaporizer}$  and  $DE_{AMS}$  of AN particles for different ADL positions ( $x_{pos}$ ).  $DE_{vaporizer}$  was evaluated from Eq. (S15) and curve fitted with the function according to Eq. (S16). The parameters  $x_{0,DC}$ ,  $\sigma_{DC}$ ,  $r_{L,DC}$ , and  $A_{scan,DC}$  were taken from the corresponding measurement with particle size of 483 nm, representing the size of doubly charged particles of 297 nm in size. The bars for the uncertainty of the detection efficiency  $DE_{vaporizer}$  are based on the counting statistics of the CPC as well as the estimated counting statistics expected at the ERICA-AMS. Additionally, the noise of the filter measurement was considered.  $x_{0,DC}$ ,  $\sigma_{DC}$ ,  $r_{eff,DC}$ ,  $A_{scan,DC}$ ,  $f_{SC}$ , and  $f_{DC}$  were kept constant and thus appear to have no uncertainty. The wide plateau of the profile is caused by the well-defined edges of the vaporizer.

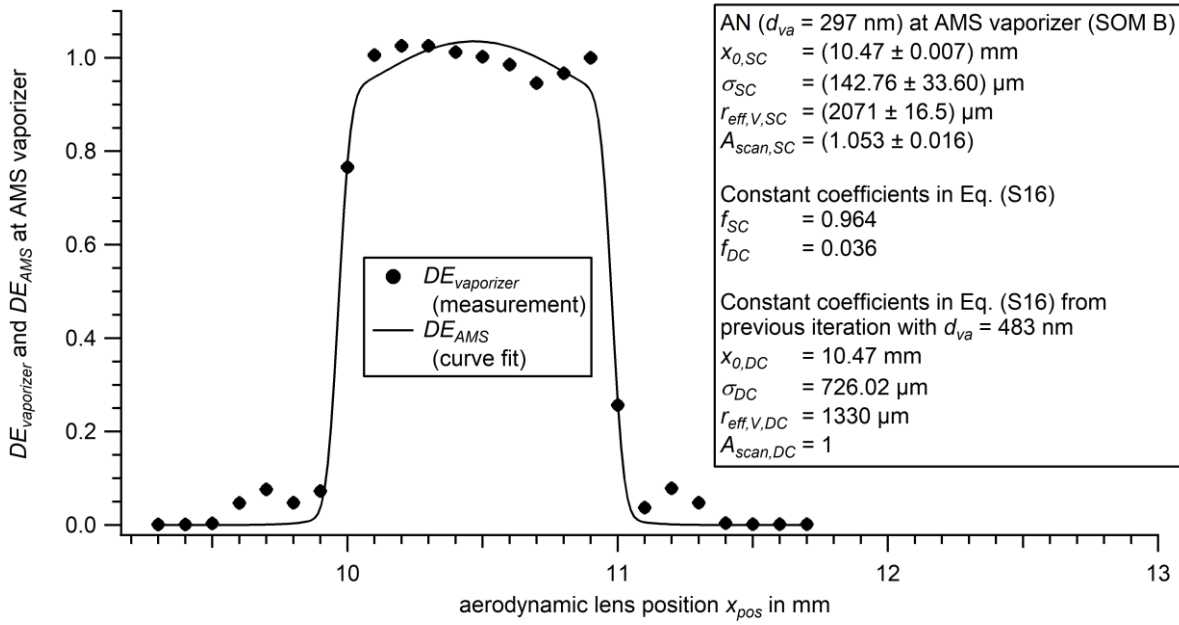

Fig. S11: Scan of the ADL position ( $x_{pos}$ ) with AN particles of  $d_{va} = 297$  nm at the ERICA-AMS vaporizer. The particle mass detection efficiency  $DE_{vaporizer}$  was evaluated from Eq. (S15) (markers) and curve fitted ( $DE_{AMS}$ ; line) with a function according to Eq. (S16). The results and constants of the curve fits are shown in the text box. The values of  $\sigma_{SC}$ ,  $\sigma_{DC}$ ,  $r_{eff,V,SC}$ , and  $r_{eff,V,DC}$  were rescaled according to the instrument's geometry (see Sect. S1.2), using the intercept theorem. The uncertainty of the detection efficiency is based on counting statistics of the CPC as well as the estimated counting statistic expected for the ERICA-AMS. The uncertainty of the lens position results from reading errors. The uncertainty bars are in all cases smaller than the symbol.

#### S4.5 Determination of maximum detection efficiency $DE_{max}$ and the detection efficiency for the field deployment in Kathmandu $DE_{KTM}$

The parameters that are needed to determine  $DE_{max}$  and  $DE_{KTM}$  (see Sect. 3.3.3) were obtained from curve fittings (see Sects. 3.3.2 and S4.2). The corresponding equations for all efficiencies are comprehended here:

- 5 Determination of  $DE_{max}$  for PSL particles at PDU1 and PDU2:

$$DE_{max} = \frac{1}{2} \cdot \left( \operatorname{erf} \left( \frac{x_{pos} + r_{eff,L} - x_0}{\sqrt{2}\sigma} \right) - \operatorname{erf} \left( \frac{x_{pos} - r_{eff,L} - x_0}{\sqrt{2}\sigma} \right) \right) \cdot A_{scan} \quad (S20)$$

Determination of  $DE_{max}$  for AN particles at PDU1 and PDU2:

$$DE_{max} = \left( \frac{1}{2} \cdot \left( \operatorname{erf} \left( \frac{x_{pos} + r_{eff,L,SC} - x_{0,SC}}{\sqrt{2}\sigma_{SC}} \right) - \operatorname{erf} \left( \frac{x_{pos} - r_{eff,L,SC} - x_{0,SC}}{\sqrt{2}\sigma_{SC}} \right) \right) \right) \cdot A_{scan,SC} \quad (S21)$$

Determination of  $DE_{max}$  for AN particles at the ERICA-AMS:

$$DE_{max} = \left( \frac{1}{2} \cdot \left( \operatorname{erf} \left( \frac{x_{pos} + r_{eff,V,SC} - x_{0,SC}}{\sqrt{2}\sigma_{SC}} \right) - \operatorname{erf} \left( \frac{x_{pos} - r_{eff,V,SC} - x_{0,SC}}{\sqrt{2}\sigma_{SC}} \right) \right) \right) \cdot A_{scan,SC} \quad (S22)$$

10

Determination of  $DE_{KTM}$  for PSL particles at PDU1 and PDU2, where  $x_{pos} = 10.55$  mm:

$$DE_{KTM} = \frac{1}{2} \cdot \left( \operatorname{erf} \left( \frac{10.55 + r_{eff,L} - x_0}{\sqrt{2}\sigma} \right) - \operatorname{erf} \left( \frac{10.55 - r_{eff,L} - x_0}{\sqrt{2}\sigma} \right) \right) \cdot A_{scan} \quad (S23)$$

Determination of  $DE_{KTM}$  for AN particles at PDU1 and PDU2, where  $x_{pos} = 10.55$  mm:

$$DE_{KTM} = \left( \frac{1}{2} \cdot \left( \operatorname{erf} \left( \frac{10.55 + r_{eff,L,SC} - x_{0,SC}}{\sqrt{2}\sigma_{SC}} \right) - \operatorname{erf} \left( \frac{10.55 - r_{eff,L,SC} - x_{0,SC}}{\sqrt{2}\sigma_{SC}} \right) \right) \right) \cdot A_{scan,SC} \quad (S24)$$

- 15 Determination of  $DE_{KTM}$  for AN particles at the ERICA-AMS, where  $x_{pos} = 10.55$  mm:

$$DE_{KTM} = \left( \frac{1}{2} \cdot \left( \operatorname{erf} \left( \frac{10.55 + r_{eff,V,SC} - x_{0,SC}}{\sqrt{2}\sigma_{SC}} \right) - \operatorname{erf} \left( \frac{10.55 - r_{eff,V,SC} - x_{0,SC}}{\sqrt{2}\sigma_{SC}} \right) \right) \right) \cdot A_{scan,SC} \quad (S25)$$

## S4.6 Particle beam characteristics

### S4.6.1 Scaling parameter $A_{scan}$

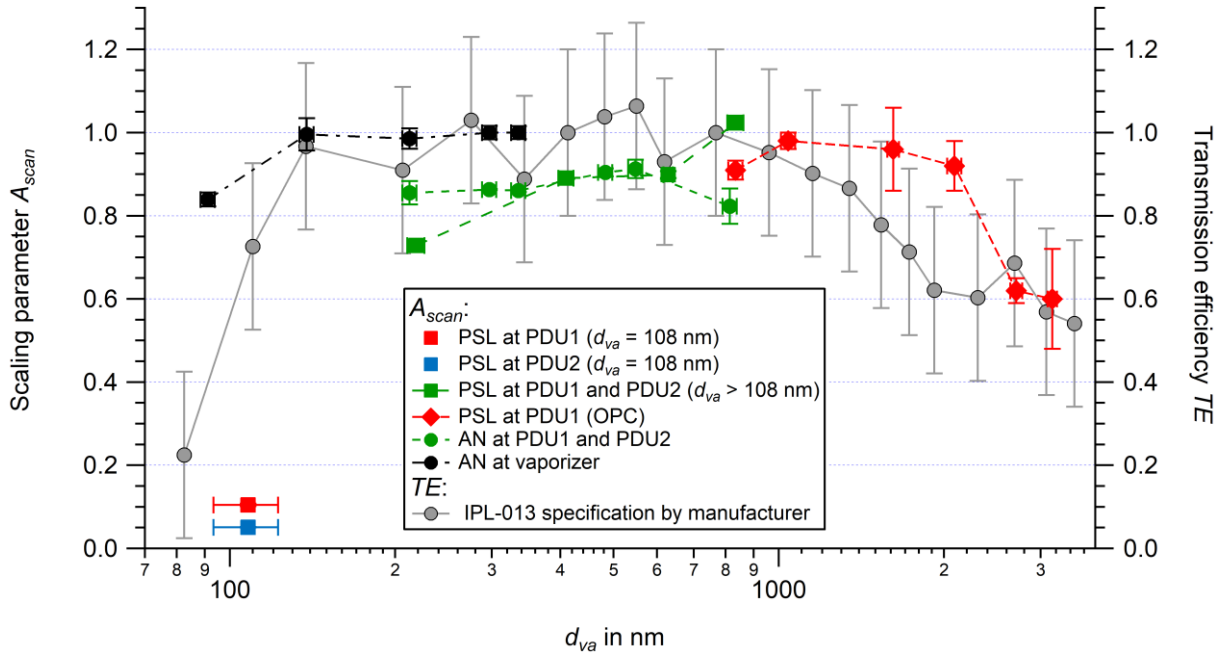

5 Fig. S12: The scaling parameter  $A_{scan}$  (left ordinate) as a function of particle size  $d_{va}$  for PSL (squares) and AN (circles) particles measured at the detection units PDU1 (red), PDU2 (blue), and both (PDU1 and PDU2, green), AN particles at the ERICA-AMS vaporizer (black). The reference values for number concentrations were either obtained from the experimental setup with the CPC or the OPC (Setup B or C, respectively, see Fig. S7). The IPL-013 specification transmission efficiency ( $TE$ ) curve (data provided by manufacturer Aerodyne Research Inc.) is plotted in gray (right ordinate) as a function of particle size  $d_{va}$ . The PSL particle measurements with sizes of 108 nm were evaluated not by a combined curve-fitting procedure but individually (see red and blue symbol in the lower left corner). The uncertainties of  $A_{scan}$  result from the curve-fitting (one standard deviation). The uncertainty of  $TE$  is  $\pm 0.2$  and was estimated from the uncertainties presented in Peck et al. (2016). The uncertainty of PSL particle size is given by NIST certificates and converted to  $d_{va}$ . The uncertainty of AN particle size  $d_{va}$  is estimated to be 3 % (Hings, 2006). These uncertainties for PSL and AN particle sizes are the same for Fig. S12 up to Fig. S14. The error bars are in some cases smaller than the symbol.

15 One parameter provided by the curve-fitting functions (Eq. (5), and Eqs. (S14) and (S16)) is the scaling parameter  $A_{scan}$ . The parameter  $A_{scan}$  represents the difference of the scan peak value maximum to 100 %. As mentioned above (see Sect. 3.3.1)  $A_{scan}$  is largely affected by the transmission efficiency of the ADL. In Fig. S12, the parameter  $A_{scan}$  is plotted together with the transmission efficiency  $TE$  as specified by the manufacturer (Aerodyne) as a function of the particle size  $d_{va}$ .

Due to the combined curve-fitting procedure described in Sect. 3.3.1, the value of  $A_{scan}$  at PDU1 equals the value at PDU2 for each particle type and size. This is the case for all AN particle measurements and for all PSL particle measurements for particle sizes larger than 108 nm. Since the evaluation of the measurement with PSL particles of 108 nm in size was not conducted by a combined curve-fitting routine, two values of  $A_{scan}$  are available for one PSL particle size (see Sect. 3.3.1). In contrast to particle sizes larger than 108 nm, for particles of 108 nm in size, the particle beam width is broader than the effective laser width (see Fig. 6 in 3.3.2). This presumably is the case along the laser beam axis and not only along the scan direction.

25 This circumstance leads to detection losses of particles, which are even higher for PDU2 than for PDU1, due to the particle beam divergence, and indicates that the  $A_{scan}$  values determined for the detection units for PSL particles of 108 nm in size are limited by the optical detection, rather than the  $TE$  of the ADL (0.10 at PDU1 and 0.05 at PDU2 for PSL particles). For the measurements with particles larger than 108 nm in size, the parameter  $A_{scan}$  increases with particle size and reaches a maximum value of 1 for PSL particles of 834 nm in size. For the measurements with particles larger than 834 nm in size,  $A_{scan}$  decreases.

30 The values of  $A_{scan}$  determined by measurements at the vaporizer of the ERICA-AMS are not directly comparable to the values of the measurements at the PDUs, due to the freedom of determining the ionization efficiency (IE) calibration factor

(see Sect. 3.6.2) at the ERICA-AMS. Thus, the maximum  $A_{scan}$  value, for a particle size of 335 nm, was normalized to 1. A decrease of  $A_{scan}$  is obtained for particles of 91 nm in size.

The parameter  $A_{scan}$  can be used as an approximation to describe the ADL transmission efficiency  $TE$  as used by Molleker et al. (2020) for the ERICA. The data of the gray curve ( $TE$ ) was provided by the manufacturer (Aerodyne Inc.) in the datasheet of the here applied ADL model (IPL-013). It shows the  $TE$  of the ADL deployed in the ERICA. A good agreement between  $A_{scan}$  and the specified  $TE$  is achieved by means of optical particle detection for particle sizes between 200 nm and 3000 nm. The here-used ADL type was comprehensively described by Peck et al. (2016) and Xu et al. (2017). Xu et al. (2017) show that the  $TE$  is above 0.80 in a size range between 200 nm and 2000 nm reaching a maximum of 1 in the size range between 300 nm and 1000 nm. This is slightly higher than what was achieved in the measurements here presented. A reason might be the different method for determination of  $A_{scan}$  (here) and of  $TE$  by Xu et al. (2017). The  $d_{50}$  cut-offs of the  $TE$  are reported for particle sizes between  $\sim 120$  nm and  $3.5 \mu\text{m}$  (Xu et al., 2017). For PSL and AN, the  $A_{scan}$  values were found to be above 0.7 for the size range between 200 nm and 2090 nm and above 0.6 for particle sizes up to 3150 nm. For the lower size cut-off, the measurement with the AMS has to be considered. The rather stable values of  $A_{scan}$  for particle sizes between 138 nm and 335 nm agrees well with the specified values of  $TE$ . For a particle size of 91 nm, however,  $A_{scan}$  is above the specified value of  $TE$ , probably indicating a lower  $d_{50}$  cut-off than specified.

Overall, the ADL deployed is suitable to transmit the accumulation mode and partly the coarse mode of the ambient aerosol.  $A_{scan}$  is a reasonable measure of the  $TE$  for large particle sizes (larger than 200 nm) at the PDUs by optical means, but not for smaller particle sizes. For particle sizes smaller than 200 nm, the measurements at the ERICA-AMS are more suitable to estimate the  $TE$ , however, no  $d_{50}$  cut-offs can be obtained from these measurements.

#### S4.6.2 Particle beam shift $x_{0,shift}$

During the development of the instrument, it was found that the particle beam cross-sectional profiles for all particle sizes appear as non-concentric as indicated by various  $x_0$  values. This deviation of the various  $x_0$  values from the adjusted particle beam axis center is termed particle beam shift  $x_{0,shift}$ . To quantify the deviation of the various modal values  $x_0$  from the adjusted axis center ( $x_{pos} = 10.55$  mm) at the location of PDU1 and PDU2, the value  $x_{pos} = 10.55$  mm was subtracted from the  $x_0$  values as determined by the curve-fitting procedures. After this calculation, the distance ratios in the geometry of the instrument (see Sect. S1.2) were considered for both locations. In Fig. S13, the parameter  $x_{0,shift}$  is plotted versus the particle size  $d_{va}$  for PSL and AN particles. The maximum value of  $x_{0,shift}$  is 0.21 mm at PDU2 ( $d_{va} = 834$  nm) for PSL particles and 0.62 mm for AN particles at the vaporizer ( $d_{va} = 138$  nm).

After the described lens rotation (see Sect. S3), which occurred after the StratoClim campaign and after the characterization measurements presented in Sect. 3.3, we found that the overall particle beam cross-sectional area does not describe a circle but an oval shape. By that rotation,  $x_{0,shift}$  appears to be reduced. This observation is part of further investigations and, since the condition during the StratoClim campaign is described here, is not part of this publication.

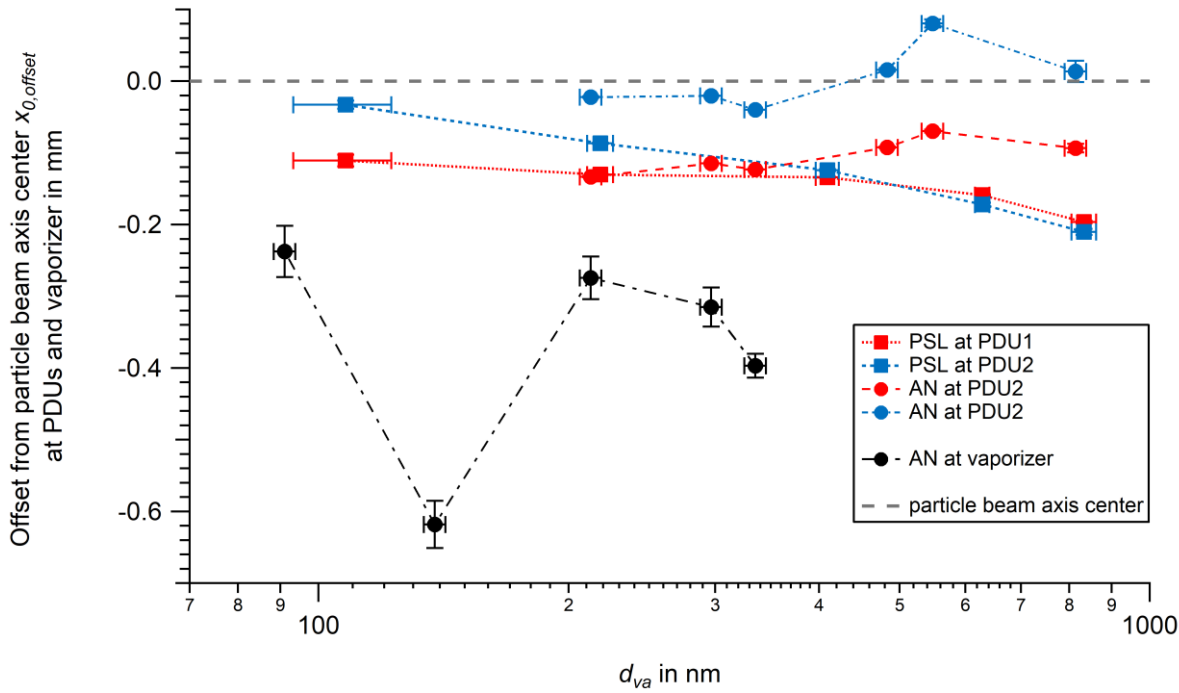

Fig. S13: The deviation of the various modal values  $x_0$  from the adjusted particle beam axis center ( $x_{pos} = 10.55$  mm; dark gray horizontal dashed line) at the location of PDU1 and PDU2 (termed  $x_{0,shift}$ ) as a function of particle size  $d_{va}$  for PSL (squares) and AN (circles) particles measured at PDU1 (red) and PDU2 (blue), and for AN particles measured at the ERICA-AMS vaporizer (black). Uncertainties of  $x_{0,shift}$  result from the curve-fittings (one standard deviation). The uncertainty of PSL particle size  $d_{va}$  is given by NIST certificates. The uncertainty of AN particle size  $d_{va}$  is estimated to be 3 % (Hings, 2006). The error bars are in some cases smaller than the symbol.

### S4.6.3 Particle beam divergence $\alpha$

The particle beam divergence  $\alpha$  is displayed in Fig. S14 for various PSL and AN particle sizes, at both detection stages (PDU1 and PDU2), and at the ERICA-AMS vaporizer, calculated from the particle beam width analogue  $\sigma$  defined as:

$$\alpha = \frac{\sigma}{z_{asd}} \quad (S26)$$

The parameter  $\sigma$  is in the dimension of a  $\frac{1}{\sqrt{e}}$ -radius and  $z_{asd}$  is the distance from the adjustment screws to the ball joint of the ADL in the recipient ( $z_{asd} = 133.7$  mm, see Sect. S1.2). It is apparent that the very small particles ( $d_{va} < 200$  nm) diverge into a much wider cone than the other measured sizes. The reason for this is the collisional interaction with the residual air molecules right after critical expansion (Huffman et al., 2005). The values at PDU1 are larger than for the values at PDU2 for small particles. One reason is the fact that these particle sizes do not have a common, single starting point but rather a finite starting area within the cross-section of the lens's exit. This fact might be caused by turbulence in the ADL and leads to a discrepancy of the different divergence values for the same particle sizes at different distances from the ADL's exit. Values of  $\alpha$  measured at PDU2 are more reliable than those measured at PDU1, since the influence of the initial conditions within the starting area is higher for measurements closer to the ADL, i.e., measurements at PDU1, than for measurements further from the ADL, i.e., measurements at PDU2 and at the vaporizer. This is especially the case for the measurements with PSL particles of 108 nm in size. Larger particle sizes ( $d_{va} > 421$  nm) tend to slightly higher  $\alpha$  values. For particle sizes between 218 nm and 834 nm, the particle beam divergence  $\alpha$  seems to be independent of the particle type. A minimum for  $\alpha$  of 0.1 mrad can be extracted from the measurements with AN particles of 335 nm in size at PDU2 and a maximum of 4.6 mrad for PSL particles of 108 nm in size at PDU1.

The measurements with the OPC as reference device were obtained before the ADL rotation (see Sect. S3). However, considering a rotationally symmetric particle beam profile for each specific particle size, the divergence is unaffected by the ADL rotation. The values for these measurements are between 1.1 mrad and 1.7 mrad.

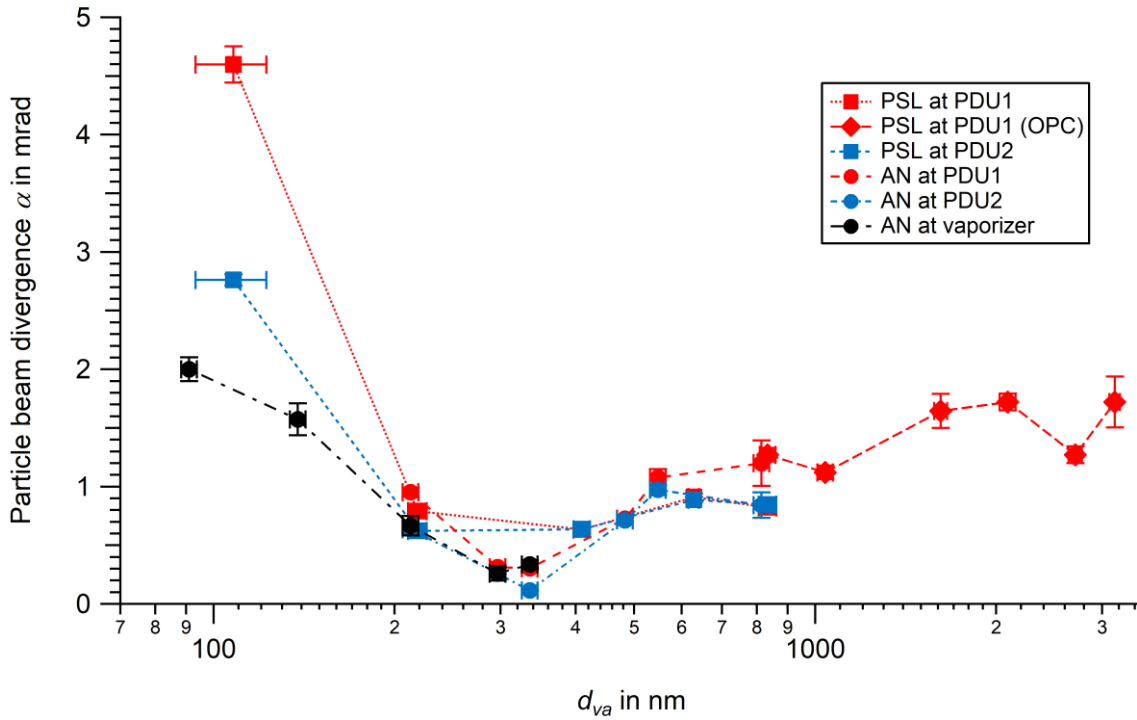

5 Fig. S14: The particle beam divergence  $\alpha$  as a function of particle size  $d_{va}$  for PSL (squares) and AN (circles) particles measured at the detection units PDU1 (red) and PDU2 (blue), and for AN particles measured at the ERICA-AMS vaporizer (black). The reference values for number concentrations were either obtained from the experimental setup with the CPC or the OPC (Setup B or C, respectively, see Fig. S7). Values of  $\alpha$  measured at PDU2 are more reliable than those measured at PDU1 (see text). The uncertainties of  $\alpha$  result from the curve fitting (one standard deviation) and reading errors. The uncertainty of PSL particle size  $d_{va}$  is given by  
 10 NIST certificates. The uncertainty of AN particle size  $d_{va}$  is estimated to be 3 % (Hings, 2006). The uncertainty bars are in some cases smaller than the symbol.



## S5 Mass resolution of the ERICA-AMS

Fig. S15 displays the mass resolution  $R_{MS} = m/\Delta m$  as function of the  $m/z$ -ratio for the ERICA-AMS calculated by the evaluation software “Tofware”. This is comparable for a commercial C-ToF-MS from Aerodyne (DeCarlo et al., 2006).

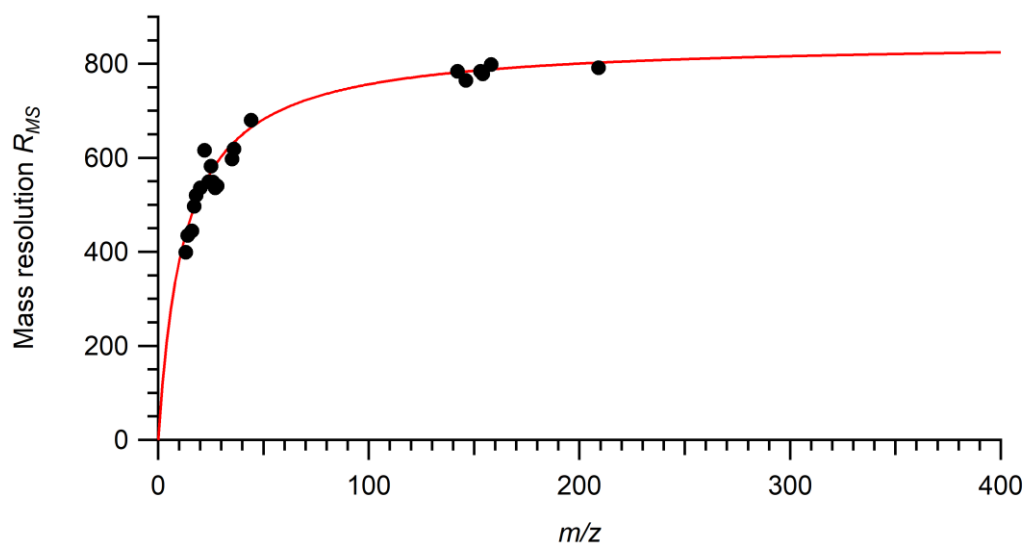

5 Fig. S15: Mass resolution  $R_{MS}$  of the ERICA-AMS spectrum fitted through the largest peaks.

## S6 Mean spectrum of meteoric material containing single particles

As identified and described by Murphy et al. (1998) and Cziczo et al. (2001), the meteoric material containing particle type is characterized by a high abundance of magnesium ( $\text{Mg}^+$ , isotopes at  $m/z$  24,  $m/z$  25, and  $m/z$  26) and iron ( $\text{Fe}^+$ , isotopes at  $m/z$  56 and  $m/z$  54) signals in the cation spectrum and of sulfate ( $\text{HSO}_4^-$  at  $m/z$  -97) in the anion spectrum. In Fig. S16, the mean spectrum of the meteoric material-containing particle type, including 956 mass spectra measured during one research flight, is shown. Also sodium ( $\text{Na}^+$ ,  $m/z$  23), aluminum ( $\text{Al}^+$ ,  $m/z$  27), and calcium signals ( $\text{Ca}^+$ ,  $m/z$  40) as well as other sulfate fragments, such as  $\text{SO}_3^-$  ( $m/z$  -80),  $\text{SO}_4^-$  ( $m/z$  -96),  $\text{H}^{34}\text{SO}_4^-$  ( $m/z$  -99),  $\text{HSO}_4\text{SO}_3^-$  ( $m/z$  -177),  $\text{HSO}_4\text{SO}_4^-$  ( $m/z$  -193), and  $\text{H}_2\text{SO}_4\text{HSO}_4^-$  ( $m/z$  -195) can be found in the mean spectrum. In the mass spectra of this particle type recorded with ERICA-LAMS, a signal at  $m/z$  -44, suspected as  $\text{SiO}^-$ , is present.

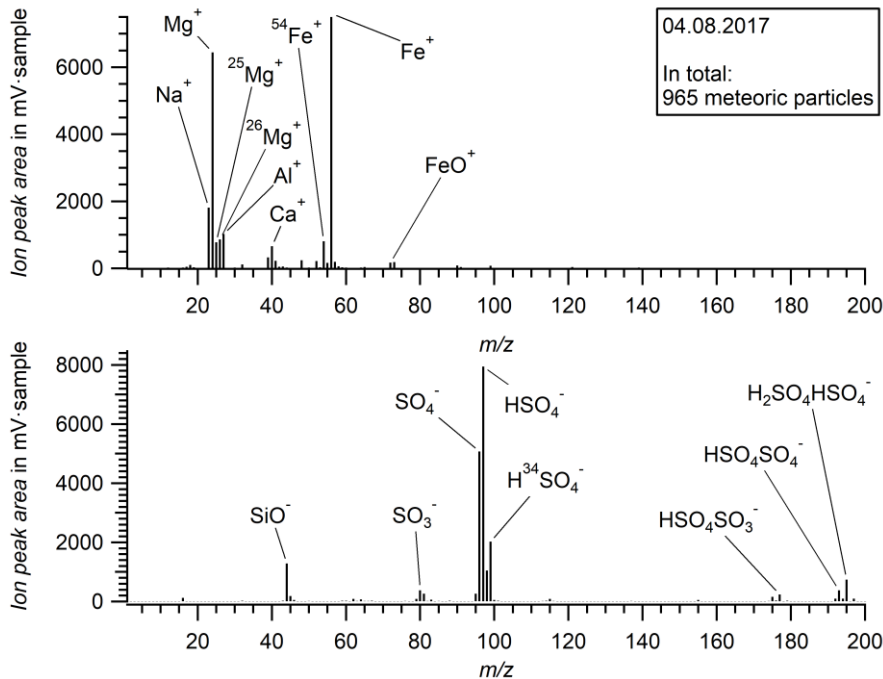

10 **Fig. S16: Mean spectrum of 956 meteoric material containing single particles recorded during a research flight on 04.08.2017 during StratoClim in Nepal.**

## References

- Allen, M. D., and Raabe, O. G.: Slip Correction Measurements of Spherical Solid Aerosol Particles in an Improved Millikan Apparatus, *Aerosol Sci. Technol.*, 4, 269-286, <https://doi.org/10.1080/02786828508959055>, 1985.
- 5 Bohren, C. F., and Huffman, D. R.: Absorption and scattering of light by small particles, Wiley science paperback series, New York, NY, USA a.o., 1998.
- Cziczo, D. J., Thomson, D. S., and Murphy, D. M.: Ablation, Flux, and Atmospheric Implications of Meteors Inferred from Stratospheric Aerosol, *Science*, 291, 1772-1775, <https://doi.org/10.1126/science.1057737>, 2001.
- 10 DeCarlo, P. F., Slowik, J. G., Worsnop, D. R., Davidovits, P., and Jimenez, J. L.: Particle Morphology and Density Characterization by Combined Mobility and Aerodynamic Diameter Measurements. Part 1: Theory, *Aerosol Sci. Technol.*, 38, 1185-1205, <https://doi.org/10.1080/027868290903907>, 2004.
- 15 DeCarlo, P. F., Kimmel, J. R., Trimborn, A., Northway, M. J., Jayne, J. T., Aiken, A. C., Gonin, M., Fuhrer, K., Horvath, T., Docherty, K. S., Worsnop, D. R., and Jimenez, J. L.: Field-Deployable, High-Resolution, Time-of-Flight Aerosol Mass Spectrometer, *Anal. Chem.*, 78, 8281-8289, <https://doi.org/10.1021/ac061249n>, 2006.
- 20 Dragoneas, A., Molleker, S., Appel, O., Hünig, A., Böttger, T., Hermann, M., Drewnick, F., Schneider, J., Weigel, R., and Borrmann, S.: The realization of autonomous, aircraft-based, real-time aerosol mass spectrometry in the stratosphere, *Atmos. Meas. Tech.*, in preparation, n/a, 2021.
- Eichler, H. J., Kronfeldt, H.-D., and Sahn, J.: *Das neue Physikalische Grundpraktikum*, 3rd edition ed., Springer-Lehrbuch, 25 Springer, Berlin and Heidelberg, Germany, 2016.
- Galpin, T., Chartier, R. T., Levergood, N., and Greenslade, M. E.: Refractive index retrievals for polystyrene latex spheres in the spectral range 220–420 nm, *Aerosol Sci. Technol.*, 51, 1158-1167, <https://doi.org/10.1080/02786826.2017.1339014>, 2017.
- 30 Hinds, W. C.: *Aerosol technology: properties, behavior, and measurement of airborne particles*, 2nd edition ed., Wiley, New York, NY, USA, XX, 483 pp., 1999.
- Hings, S.: *Characterisation and Field Deployment of a Novel Quantitative Time-of-Flight Aerosol Mass Spectrometer (ToF-AMS)*, PhD thesis, Johannes Gutenberg-Universität Mainz, Mainz, Germany, <https://doi.org/10.25358/openscience-3333>, 35 2006.
- Huffman, J. A., Jayne, J. T., Drewnick, F., Aiken, A. C., Onasch, T., Worsnop, D. R., and Jimenez, J. L.: Design, Modeling, Optimization, and Experimental Tests of a Particle Beam Width Probe for the Aerodyne Aerosol Mass Spectrometer, *Aerosol Sci. Technol.*, 39, 1143-1163, <https://doi.org/10.1080/02786820500423782>, 2005.
- 40 Hünig, A.: *Development, characterization, and first field deployments of a novel aerosol mass spectrometer combining laser ablation and flash vaporization techniques for aircraft application at high altitudes*, PhD thesis, Johannes Gutenberg-Universität Mainz, Mainz, Germany, <https://doi.org/10.25358/openscience-5554>, 2021.
- 45 Jayne, J. T., Leard, D. C., Zhang, X., Davidovits, P., Smith, K. A., Kolb, C. E., and Worsnop, D. R.: Development of an Aerosol Mass Spectrometer for Size and Composition Analysis of Submicron Particles, *Aerosol Sci. Technol.*, 33, 49-70, <https://doi.org/10.1080/027868200410840>, 2000.
- 50 Jimenez, J. L., Bahreini, R., Cocker, D. R., Zhuang, H., Varutbangkul, V., Flagan, R. C., Seinfeld, J. H., O'Dowd, C. D., and Hoffmann, T.: New particle formation from photooxidation of diiodomethane (CH<sub>2</sub>I<sub>2</sub>), *J. Geophys. Res.-Atmos.*, 108, <https://doi.org/10.1029/2002JD002452>, 2003a.
- 55 Jimenez, J. L., Bahreini, R., Cocker, D. R., Zhuang, H., Varutbangkul, V., Flagan, R. C., Seinfeld, J. H., O'Dowd, C. D., and Hoffmann, T.: Correction to “New particle formation from photooxidation of diiodomethane (CH<sub>2</sub>I<sub>2</sub>)”, *J. Geophys. Res.-Atmos.*, 108, <https://doi.org/10.1029/2003JD004249>, 2003b.
- Liu, P. S. K., Deng, R., Smith, K. A., Williams, L. R., Jayne, J. T., Canagaratna, M. R., Moore, K., Onasch, T. B., Worsnop, D. R., and Deshler, T.: Transmission Efficiency of an Aerodynamic Focusing Lens System: Comparison of Model Calculations and Laboratory Measurements for the Aerodyne Aerosol Mass Spectrometer, *Aerosol Sci. Technol.*, 41, 721-733, 60 <https://doi.org/10.1080/02786820701422278>, 2007.

- Molleker, S., Helleis, F., Klimach, T., Appel, O., Clemen, H.-C., Dragoneas, A., Gurk, C., Hünig, A., Köllner, F., Rubach, F., Schulz, C., Schneider, J., and Borrmann, S.: Application of an O-ring pinch device as a constant pressure inlet (CPI) for airborne sampling, *Atmos. Meas. Tech.*, 2020, 1-13, <https://doi.org/10.5194/amt-2020-66>, 2020.
- 5 Murphy, D. M., Thomson, D. S., and Mahoney, M. J.: In Situ Measurements of Organics, Meteoritic Material, Mercury, and Other Elements in Aerosols at 5 to 19 Kilometers, *Science*, 282, 1664-1669, <https://doi.org/10.1126/science.282.5394.1664>, 1998.
- Peck, J., Gonzalez, L. A., Williams, L. R., Xu, W., Croteau, P. L., Timko, M. T., Jayne, J. T., Worsnop, D. R., Miake-Lye, R. C., and Smith, K. A.: Development of an aerosol mass spectrometer lens system for PM<sub>2.5</sub>, *Aerosol Sci. Technol.*, 50, 781-789, <https://doi.org/10.1080/02786826.2016.1190444>, 2016.
- 10 Seinfeld, J. H., and Pandis, S. N.: *Atmospheric chemistry and physics : from air pollution to climate change*, 3rd edition ed., A Wiley-Interscience publication, Wiley, Hoboken, NJ, USA, 1152 pp., 2016.
- 15 Tigges, L., Wiedensohler, A., Weinhold, K., Gandhi, J., and Schmid, H. J.: Bipolar charge distribution of a soft X-ray diffusion charger, *J. Aerosol Sci*, 90, 77-86, <https://doi.org/10.1016/j.jaerosci.2015.07.002>, 2015.
- Vetter, T.: *Berechnung der Mie-Streufunktionen zur Kalibrierung optischer Partikelzähler*, diploma thesis, Johannes Gutenberg-Universität Mainz, Mainz, Germany, 2004.
- 20 Wiedensohler, A.: An approximation of the bipolar charge distribution for particles in the submicron size range, *J. Aerosol Sci*, 19, 387-389, [https://doi.org/10.1016/0021-8502\(88\)90278-9](https://doi.org/10.1016/0021-8502(88)90278-9), 1988.
- 25 Xu, W., Croteau, P., Williams, L., Canagaratna, M., Onasch, T., Cross, E., Zhang, X., Robinson, W., Worsnop, D., and Jayne, J.: Laboratory characterization of an aerosol chemical speciation monitor with PM<sub>2.5</sub> measurement capability, *Aerosol Sci. Technol.*, 51, 69-83, <https://doi.org/10.1080/02786826.2016.1241859>, 2017.
- 30 Zapp, K.-H., Wostbrock, K.-H., Schäfer, M., Sato, K., Seiter, H., Zwick, W., Creutziger, R., and Leiter, H.: Ammonium Compounds, *Ullmann's Encyclopedia of Industrial Chemistry*, [https://doi.org/10.1002/14356007.a02\\_243](https://doi.org/10.1002/14356007.a02_243), 2000.
